# Supplementary material
Source: Royal Society of Chemistry journal article supplement (doi:10.1039/d6nj01950a)
Supplement: d6nj01950a1.pdf [file d6nj01950a1.pdf]

Supporting Information for

# **Alkane Dehydrogenation Catalyzed by PN3P Pincer Iridium Hydride Complex**

Kher Ai Chiaw,<sup>a</sup> Suma Basappa,<sup>b</sup> Manoj V. Mane,<sup>b</sup> Kuo-Wei Huang,<sup>\*c</sup> Nicholas Long,<sup>\*d</sup> Sandeep  
Suryabhan Gholap<sup>\*a</sup>

<sup>a</sup>Institute of Sustainability for Chemical, Energy and Environment (ISCE<sup>2</sup>), Agency of Science,  
Technology and Research (A\*STAR), 1 Pesek Road, Jurong Island, Singapore 627833, Singapore.

<sup>b</sup>Centre for Nano and Material Sciences, Jain (Deemed-to-be University), Bangalore, Karnataka  
562112, India

<sup>c</sup>Center for Renewable Energy and Storage Technology, Division of Physical Sciences and  
Engineering, King Abdullah University of Science and Technology, Thuwal, 23955-6900 Saudi  
Arabia, Saudi Arabia.

<sup>d</sup>Department of Chemistry, Imperial College London, White City Campus, London, W12 0BZ, United  
Kingdom.

Email: sandeep\_gholap@a-star.edu.sg, n.long@imperial.ac.uk

# Contents

|                                                                                                                                   |    |
|-----------------------------------------------------------------------------------------------------------------------------------|----|
| <b>General Information</b> .....                                                                                                  | 3  |
| <b>Experimental methods</b> .....                                                                                                 | 5  |
| <b>I. Optimizing reaction conditions for cyclooctane dehydrogenation:</b> .....                                                   | 5  |
| <b>II. Study of the effect of the different ratios of tert-butylethylene (TBE) for cyclooctane dehydrogenation reaction</b> ..... | 6  |
| <b>III. Study of the effect of reaction time for the dehydrogenation of cyclooctane</b> .....                                     | 7  |
| <b>IV. Study of the dehydrogenation of different substrates</b> .....                                                             | 8  |
| <b>NMR Spectra</b> .....                                                                                                          | 21 |
| <b>GC-MS Spectra</b> .....                                                                                                        | 22 |
| <b>I. GC-MS spectra of reaction condition optimization for cyclooctane dehydrogenation</b> ....                                   | 22 |
| <b>II. GC-MS spectra of the effect of different ratios of tert-butylethylene (TBE) for cyclooctane dehydrogenation</b> .....      | 24 |
| <b>III. Time dependent study for cyclooctane dehydrogenation</b> .....                                                            | 27 |
| <b>IV. Substrate scope study</b> .....                                                                                            | 30 |

## General Information

All manipulations involving air- and moisture-sensitive compounds were performed under an inert argon atmosphere using standard Schlenk or glovebox techniques. Solvents were purified by distillation over appropriate drying agents and stored under argon prior to use. Unless otherwise noted, commercially available reagents were used as received without further purification. Cyclooctane and tert-butylethylene substrate was obtained from Sigma-Aldrich. Column chromatography was conducted on silica gel (60–120 mesh).

NMR spectra ( $^1\text{H}$ ,  $^{13}\text{C}$ ) were recorded on Bruker Avance 400MHz spectrometers in deuterated solvents.  $^1\text{H}$  NMR chemical shifts were referenced to the residual hydrogen signals of the deuterated solvents, and the  $^{13}\text{C}$  NMR chemical shifts were referenced to the  $^{13}\text{C}$  signals of the deuterated solvents. Data are reported as follows: chemical shift, multiplicity (s = singlet, d = doublet, t = triplet, q = quartet, p = pentet, s = sextet, h = heptet, m = multiplet, br = broad), coupling constants (Hz) and integration. Gas chromatography was performed on Agilent 7890B coupled with an Agilent 5977B Mass Spectrometer Detector.

The synthesis PN<sup>3</sup>P iridium complexes, PN<sup>3</sup>P<sup>tBu</sup>IrH<sub>2</sub>Cl (**Ir1**), PN<sup>3</sup>P<sup>tBu</sup>IrH<sub>2</sub>(**Ir2**) and PN<sup>3</sup>P<sup>tBu</sup>IrH<sub>3</sub>(**Ir3**) were carried out following previously reported procedures.<sup>1</sup> The alkane dehydrogenation reactions employed cyclooctane as substrate and tert-butylethylene as hydrogen acceptor unless otherwise specified.

## Abbreviations:

COA: Cyclooctane

TBE: *Tert*-butylethylene

COE: Cyclooctene

Fe: Ferrocene

NaO<sup>t</sup>Bu: Sodium *tert*-butoxide

KO<sup>t</sup>Bu: Potassium *tert*-butoxide

## Experimental methods

### I. Optimizing reaction conditions for cyclooctane dehydrogenation:

In an argon-filled glovebox, into a J-young NMR tube, COA (3.0 mmol, 0.404 ml) and TBE (3.0 mmol, 0.386 ml) was added followed by the addition of iridium complexes **Ir1**, **Ir2** or **Ir3** (3.0  $\mu$ mol) and base (15.0  $\mu$ mol). The NMR tube was removed from glovebox and heated at 150°C in an oil bath for 24 hours. The crude reaction mixture was cooled and analyzed by GC-MS using 100 $\mu$ l of the crude reaction mixture in MeOH solvent with mesitylene (100 $\mu$ l) as internal standard.

Table 1: Optimization of reaction conditions for cyclooctane dehydrogenation<sup>a</sup>

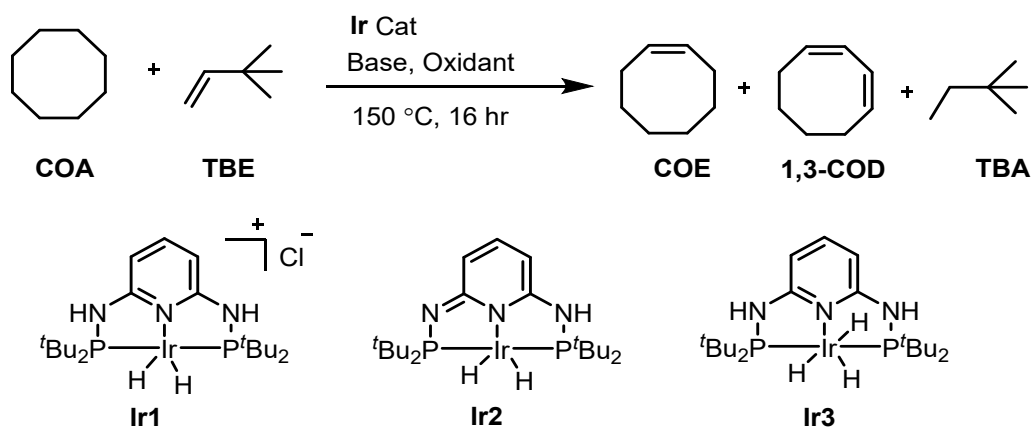

| Entry | Ir cat.    | Base                | Oxidant | Conv. (%) | TON <sup>b</sup> |
|-------|------------|---------------------|---------|-----------|------------------|
| 1     | <b>Ir1</b> | NaO <sup>t</sup> Bu | -       | 10        | 99               |
| 2     | <b>Ir2</b> | NaO <sup>t</sup> Bu | -       | 55        | 546              |
| 3     | <b>Ir3</b> | NaO <sup>t</sup> Bu | -       | 40        | 403              |
| 4     | <b>Ir1</b> | NaO <sup>t</sup> Bu | Fe      | 16        | 157              |
| 5     | <b>Ir2</b> | NaO <sup>t</sup> Bu | Fe      | 56        | 558              |
| 6     | <b>Ir3</b> | NaO <sup>t</sup> Bu | Fe      | 42        | 415              |
| 7     | <b>Ir2</b> | KO <sup>t</sup> Bu  | -       | 48        | 481              |
| 8     | <b>Ir2</b> | KO <sup>t</sup> Bu  | Fe      | 50        | 502              |

<sup>a</sup>Reaction conditions: COA (3.0 mmol, 0.404 mL), TBE (3.0 mmol, 0.386 mL), iridium complexes **Ir1**, **Ir2** or **Ir3** (3.0  $\mu$ mol, 0.1 mol%), base (15.0  $\mu$ mol, 0.5 mol%) at 150°C for 24 hr. <sup>b</sup>Determined by GC using mesitylene as an internal standard. TON were calculated based on conversion of TBE determined by GC.

## II. Study of the effect of the different ratios of tert-butylethylene (TBE) for cyclooctane dehydrogenation reaction

In an argon-filled glovebox, into a J-young NMR tube, COA (3.0 mmol, 0.404 ml) and TBE with different ratios was added followed by the addition of **Ir2** (3.0  $\mu$ mol) and NaO<sup>t</sup>Bu (15.0  $\mu$ mol). The NMR tube was removed from glovebox and heated at 150°C in an oil bath for 24 hours. The crude reaction mixture was cooled and analyzed by GC-MS using 100 $\mu$ l of the crude reaction mixture in MeOH with mesitylene (100 $\mu$ l) as internal standard.

Table 2: Effect of different TBE ratios for COA dehydrogenation<sup>a</sup>

| Entry | [Ir]:COA | [Ir]:TBE | Temp. | Conv. (%) | TON <sup>b</sup> |
|-------|----------|----------|-------|-----------|------------------|
| 1     | 1000     | 100      | 150   | 2         | 3                |
| 2     | 1000     | 500      | 150   | 24        | 118              |
| 3     | 1000     | 1000     | 150   | 55        | 546              |

<sup>a</sup>Reaction conditions: COA (3.0 mmol, 0.404 mL), TBE (0.3 - 3.0 mmol) **Ir2** (3.0  $\mu$ mol, 0.1 mol%), NaO<sup>t</sup>Bu (15.0  $\mu$ mol, 0.5 mol%) at 150°C for 24 hr. <sup>b</sup>Determined by GC using mesitylene as an internal standard. TON were calculated based on conversion of TBE determined by GC.

### III. Study of the effect of reaction time for the dehydrogenation of cyclooctane

In an argon-filled glovebox, into a J-young NMR tube, COA (3.0 mmol, 0.404 ml) and TBE (3.0 mmol, 0.386 ml) was added followed by the addition of **Ir2** (3.0  $\mu$ mol) and base (15.0  $\mu$ mol). The NMR tube was removed from glovebox and heated at 150°C in an oil bath for 4h, 16h, and 24h. The crude reaction mixture was cooled and analyzed by GC-MS using 100 $\mu$ l of the crude reaction mixture in MeOH with mesitylene (100 $\mu$ l) as internal standard.

Table 3: Time dependent study of COA dehydrogenation with different bases<sup>a</sup>

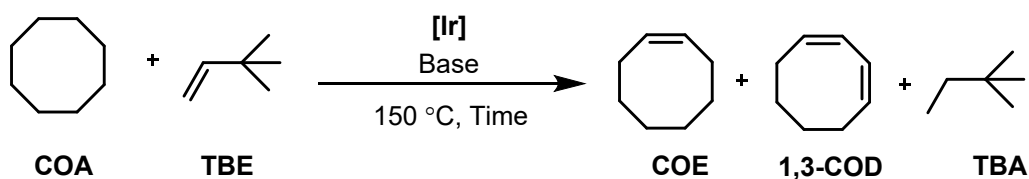

| Entry | Time (hr) | Base                | Conv. of TBE (%) | TON <sup>b</sup> |
|-------|-----------|---------------------|------------------|------------------|
| 1     | 4         | KO <sup>t</sup> Bu  | 45               | 447              |
| 2     | 16        | KO <sup>t</sup> Bu  | 47               | 466              |
| 3     | 24        | KO <sup>t</sup> Bu  | 48               | 481              |
| 4     | 4         | NaO <sup>t</sup> Bu | 49               | 499              |
| 5     | 16        | NaO <sup>t</sup> Bu | 50               | 501              |
| 6     | 24        | NaO <sup>t</sup> Bu | 55               | 546              |

<sup>a</sup>Reaction conditions: COA (3.0 mmol, 0.404 mL), TBE (3.0 mmol, 0.386 mL), **Ir2** (3.0  $\mu$ mol, 0.1 mol%), base (15.0  $\mu$ mol, 0.5 mol%) at 150°C for specified time shown in the table. <sup>b</sup>Determined by GC using mesitylene as an internal standard. TON were calculated based on conversion of TBE determined by GC.

#### IV. Study of the dehydrogenation of different substrates

In an argon-filled glovebox, into a J-young NMR tube, alkane (3.0 mmol) and TBE (3.0 mmol) were added followed by the addition of **Ir2** (3.0  $\mu$ mol) and NaO<sup>t</sup>Bu (15.0  $\mu$ mol). The NMR tube was removed from glovebox and heated at 150°C in an oil bath for 24 hours. The crude reaction mixture was cooled and analyzed by GC-MS using 100 $\mu$ l of the crude reaction mixture in MeOH with mesitylene (100 $\mu$ l) as internal standard.

Table 4: Substrate scope study of dehydrogenation with standard conditions

| alkane + TBE |                                                                                     | $\xrightarrow[150\text{ }^\circ\text{C, 16 hr}]{\text{Ir2 Cat, NaO}^t\text{Bu}}$                                     |                                                                                                      | alkene + TBA |  |
|--------------|-------------------------------------------------------------------------------------|----------------------------------------------------------------------------------------------------------------------|------------------------------------------------------------------------------------------------------|--------------|--|
| Entry        | Alkane                                                                              | Product                                                                                                              |                                                                                                      | Conv.(%)     |  |
| 1            | n-octane                                                                            | 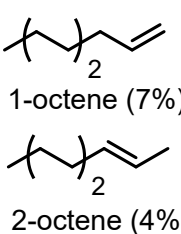<br>1-octene (7%)<br>2-octene (4%) | <br>4%            | 15           |  |
| 2            |  |                                   | <br>not observed | 10           |  |
| 3            |  | <br>20%                           | <br>5%           | 25           |  |

<sup>a</sup>Reaction conditions: Alkane (3.0 mmol), TBE (3.0 mmol), **Ir2** (3.0  $\mu$ mol, 0.1 mol%), NaO<sup>t</sup>Bu (15.0  $\mu$ mol, 0.5 mol%) at 150°C for 24 hr. <sup>b</sup>Determined by GC using mesitylene as an internal standard. TON were calculated based on conversion of TBE determined by GC.

## COMPUTATIONAL METHODS

All calculations were performed employing a DFT method implemented in the Gaussian 16 suite of programs.<sup>2</sup> For geometry optimization and frequency analysis, we adopted the BP86 functional.<sup>3</sup> During geometry optimization we used the split-valence plus single polarization basis set def2-SVP<sup>4</sup> for non-metals and the Stuttgart/Dresden small core RECP (relativistic effective core potential) plus valence double- $\zeta$ -basis set (SDD)<sup>5</sup> for cobalt. The geometries were optimized without any symmetrical constraints. For each transition state, in addition to analyzing the character of the normal mode associated with the imaginary frequency, intrinsic reaction coordinate (IRC) analysis<sup>6</sup> was performed to confirm that it connects the correct reactant and product on the potential energy surface. To refine the computed energy, single-point calculations were performed using the hybrid-meta-GGA M06 functional<sup>7</sup> with the def2-TZVP<sup>3,7</sup> basis set for nonmetals and SDD for Ir. Solvation energies were evaluated implicitly by a self-consistent reaction field (SCRF) approach for all the intermediates and transitions states, using the SMD continuum solvation model.<sup>8</sup> The free energies ( $\Delta G$ ), calculated at the M06(SMD)/SDD/def2-TZVP//BP86/SDD/def2-SVP level are reported throughout the article unless otherwise mentioned. The  $\Delta G$  value is obtained by augmenting the in solvent electronic energy ( $\Delta E$ ), calculated at M06(SMD)/SDD/def2-TZVP, with the corresponding free energy corrections calculated at BP86/SDD/def2-SVP in the gas phase.

**Table 5.** Cartesian coordinates (Å) of the optimized structures of all intermediates and transition states at BP86/SDD(Ir)/Def2-SVP level of theory.  $E_e^s$  represents the absolute electronic energy in Hartree at M06/SDD(Ir)/Def2-TZVP level of theory.

|                                          |               |              |              |   |               |              |              |
|------------------------------------------|---------------|--------------|--------------|---|---------------|--------------|--------------|
| <b>Cat.1</b>                             |               |              |              | C | -13.294927000 | 14.376231000 | 16.118467000 |
| <b><math>E_e^s = -1776.566893</math></b> |               |              |              | C | -13.444385000 | 15.710545000 | 15.360842000 |
|                                          |               |              |              | H | -12.823992000 | 16.517430000 | 15.797485000 |
| C                                        | -11.276756000 | 10.989283000 | 11.414214000 | H | -13.168705000 | 15.592345000 | 14.293689000 |
| Ir                                       | -11.489376000 | 11.250062000 | 16.299910000 | H | -14.504167000 | 16.045471000 | 15.413034000 |
| P                                        | -11.617596000 | 13.518071000 | 15.751370000 | C | -14.354938000 | 13.382946000 | 15.585590000 |
| N                                        | -11.553266000 | 13.529238000 | 14.046384000 | H | -14.245717000 | 13.225357000 | 14.493283000 |
| C                                        | -11.446535000 | 12.345684000 | 13.451519000 | H | -14.273745000 | 12.396086000 | 16.087569000 |
| N                                        | -11.392358000 | 11.135123000 | 14.196406000 | H | -15.371412000 | 13.793344000 | 15.774881000 |
| C                                        | -11.286456000 | 9.913833000  | 13.572685000 | C | -13.495549000 | 14.572732000 | 17.633381000 |
| C                                        | -11.227014000 | 9.795814000  | 12.179147000 | H | -13.322186000 | 13.631881000 | 18.195962000 |
| C                                        | -11.382289000 | 12.231980000 | 12.015803000 | H | -12.828013000 | 15.353845000 | 18.049414000 |
| H                                        | -11.142286000 | 8.808787000  | 11.702790000 | H | -14.541251000 | 14.898202000 | 17.828858000 |
| H                                        | -11.230065000 | 10.920277000 | 10.314752000 | C | -9.742793000  | 8.064752000  | 16.724225000 |
| H                                        | -11.422138000 | 13.162223000 | 11.433600000 | C | -8.606186000  | 9.053493000  | 16.373927000 |
| N                                        | -11.236063000 | 8.796784000  | 14.407499000 | H | -8.750528000  | 10.031454000 | 16.876373000 |
| P                                        | -11.351178000 | 8.952210000  | 16.148239000 | H | -7.633080000  | 8.623989000  | 16.699152000 |
| H                                        | -11.175964000 | 7.890526000  | 13.937048000 | H | -8.547892000  | 9.240243000  | 15.281879000 |
| H                                        | -12.366100000 | 11.336126000 | 17.615902000 | C | -9.791438000  | 7.860962000  | 18.252089000 |
| H                                        | -10.794881000 | 11.421385000 | 17.717191000 | H | -10.508499000 | 7.069337000  | 18.550581000 |

|   |               |              |              |
|---|---------------|--------------|--------------|
| H | -8.788013000  | 7.547477000  | 18.614402000 |
| H | -10.061387000 | 8.797810000  | 18.782646000 |
| C | -9.471002000  | 6.726327000  | 16.008021000 |
| H | -8.478418000  | 6.339256000  | 16.327505000 |
| H | -10.217853000 | 5.944709000  | 16.244124000 |
| H | -9.422418000  | 6.849790000  | 14.906090000 |
| C | -10.088323000 | 14.568580000 | 16.245462000 |
| C | -8.882617000  | 13.747567000 | 15.729812000 |
| H | -7.938878000  | 14.270944000 | 15.999702000 |
| H | -8.862403000  | 12.733001000 | 16.180742000 |
| H | -8.912677000  | 13.636247000 | 14.627072000 |
| C | -10.080778000 | 15.948517000 | 15.559504000 |
| H | -9.077921000  | 16.414754000 | 15.682305000 |
| H | -10.288518000 | 15.854420000 | 14.474649000 |
| H | -10.820678000 | 16.644219000 | 16.002283000 |
| C | -9.988066000  | 14.709296000 | 17.776731000 |
| H | -10.783315000 | 15.357447000 | 18.195816000 |
| H | -10.043585000 | 13.722398000 | 18.280905000 |
| H | -9.012555000  | 15.173957000 | 18.041643000 |
| C | -12.942893000 | 7.952864000  | 16.570790000 |
| C | -14.056460000 | 8.603297000  | 15.717292000 |
| H | -13.894668000 | 8.446962000  | 14.631753000 |
| H | -15.035431000 | 8.151149000  | 15.988182000 |
| H | -14.113264000 | 9.696945000  | 15.898911000 |
| C | -13.274218000 | 8.164459000  | 18.064402000 |
| H | -13.319100000 | 9.243643000  | 18.315328000 |
| H | -14.268310000 | 7.717874000  | 18.285499000 |
| H | -12.539039000 | 7.682971000  | 18.738722000 |
| C | -12.862318000 | 6.448662000  | 16.249110000 |
| H | -12.166056000 | 5.906959000  | 16.920134000 |
| H | -13.866972000 | 5.990626000  | 16.384797000 |
| H | -12.560851000 | 6.253016000  | 15.198361000 |

**NaO<sup>t</sup>Bu**

**$E_e^s = -395.2970373$**

|    |               |              |              |
|----|---------------|--------------|--------------|
| O  | -11.282453000 | 9.114072000  | 8.535782000  |
| C  | -11.230418000 | 8.168725000  | 9.542693000  |
| C  | -11.172959000 | 8.866093000  | 10.931051000 |
| H  | -12.069966000 | 9.508587000  | 11.063239000 |
| H  | -10.276756000 | 9.521162000  | 10.982588000 |
| H  | -11.129737000 | 8.148985000  | 11.781012000 |
| Na | -11.348441000 | 10.462516000 | 7.110295000  |
| C  | -9.966545000  | 7.278549000  | 9.377834000  |
| H  | -9.873826000  | 6.497039000  | 10.164764000 |
| H  | -9.992224000  | 6.774351000  | 8.387878000  |
| H  | -9.055664000  | 7.914364000  | 9.410256000  |
| C  | -12.491456000 | 7.260729000  | 9.491753000  |
| H  | -12.548227000 | 6.755992000  | 8.503361000  |
| H  | -12.501330000 | 6.478644000  | 10.283469000 |
| H  | -13.404459000 | 7.883775000  | 9.606504000  |

**<sup>t</sup>BuOH**

**$E_e^s = -233.5976047$**

|   |               |             |              |
|---|---------------|-------------|--------------|
| C | -11.283617000 | 8.163095000 | 9.609134000  |
| C | -11.227990000 | 8.862877000 | 10.981976000 |
| H | -12.143316000 | 9.469085000 | 11.140001000 |
| H | -10.350815000 | 9.544021000 | 11.041617000 |

|   |               |             |              |
|---|---------------|-------------|--------------|
| H | -11.140333000 | 8.134241000 | 11.815290000 |
| C | -9.990867000  | 7.363694000 | 9.349990000  |
| H | -9.842236000  | 6.561144000 | 10.102816000 |
| H | -10.022704000 | 6.899456000 | 8.343114000  |
| H | -9.100997000  | 8.029465000 | 9.392778000  |
| C | -12.516095000 | 7.252755000 | 9.510709000  |
| H | -12.567600000 | 6.786620000 | 8.505665000  |
| H | -12.482539000 | 6.448528000 | 10.273334000 |
| H | -13.442083000 | 7.844550000 | 9.660134000  |
| O | -11.461998000 | 9.145488000 | 8.571492000  |
| H | -10.688915000 | 9.740794000 | 8.610377000  |

**IN1**

**$E_e^s = -1938.276833$**

|    |               |              |              |
|----|---------------|--------------|--------------|
| C  | -11.008396000 | 11.024671000 | 11.302140000 |
| Ir | -11.715905000 | 11.172060000 | 16.146885000 |
| P  | -11.755574000 | 13.449869000 | 15.647117000 |
| N  | -11.477031000 | 13.501017000 | 13.955868000 |
| C  | -11.330390000 | 12.326805000 | 13.353055000 |
| N  | -11.372224000 | 11.101945000 | 14.075028000 |
| C  | -11.220633000 | 9.858783000  | 13.460510000 |
| C  | -11.048629000 | 9.808076000  | 12.036652000 |
| C  | -11.114683000 | 12.254210000 | 11.926523000 |
| H  | -11.221573000 | 8.850538000  | 11.512790000 |
| H  | -10.906602000 | 10.981369000 | 10.203941000 |
| H  | -11.076974000 | 13.200852000 | 11.371400000 |
| N  | -11.162753000 | 8.707174000  | 14.195343000 |
| P  | -11.535450000 | 8.874969000  | 15.868379000 |
| C  | -13.456738000 | 14.332117000 | 15.803855000 |
| C  | -13.522161000 | 15.640968000 | 14.992146000 |
| H  | -12.945897000 | 16.461506000 | 15.461904000 |
| H  | -13.136436000 | 15.485794000 | 13.964602000 |
| H  | -14.580354000 | 15.978826000 | 14.923234000 |
| C  | -14.460898000 | 13.324189000 | 15.195621000 |
| H  | -14.236464000 | 13.126950000 | 14.127368000 |
| H  | -14.439664000 | 12.355191000 | 15.736903000 |
| H  | -15.489422000 | 13.744033000 | 15.258855000 |
| C  | -13.813416000 | 14.576204000 | 17.282562000 |
| H  | -13.695516000 | 13.654601000 | 17.890142000 |
| H  | -13.194350000 | 15.375714000 | 17.738020000 |
| H  | -14.874832000 | 14.901185000 | 17.360182000 |
| C  | -10.039265000 | 8.017083000  | 16.741149000 |
| C  | -8.816550000  | 8.894350000  | 16.387479000 |
| H  | -9.002878000  | 9.959726000  | 16.638261000 |
| H  | -7.919170000  | 8.540272000  | 16.941134000 |
| H  | -8.569781000  | 8.861671000  | 15.302723000 |
| C  | -10.229916000 | 8.065003000  | 18.272062000 |
| H  | -11.040213000 | 7.392527000  | 18.615069000 |
| H  | -9.294164000  | 7.740682000  | 18.779231000 |
| H  | -10.467911000 | 9.093473000  | 18.612344000 |
| C  | -9.778137000  | 6.568659000  | 16.285733000 |
| H  | -8.784211000  | 6.225880000  | 16.651745000 |
| H  | -10.533160000 | 5.860189000  | 16.678333000 |
| H  | -9.786917000  | 6.467734000  | 15.177774000 |
| C  | -10.299476000 | 14.494010000 | 16.342325000 |
| C  | -9.033404000  | 13.722221000 | 15.901906000 |
| H  | -8.130573000  | 14.232324000 | 16.305478000 |
| H  | -9.049055000  | 12.678794000 | 16.281990000 |
| H  | -8.950124000  | 13.687361000 | 14.796758000 |
| C  | -10.248170000 | 15.915052000 | 15.749655000 |

|    |               |              |              |
|----|---------------|--------------|--------------|
| H  | -9.273042000  | 16.387735000 | 16.004276000 |
| H  | -10.341719000 | 15.890422000 | 14.645115000 |
| H  | -11.043736000 | 16.570051000 | 16.157690000 |
| C  | -10.351854000 | 14.537839000 | 17.882281000 |
| H  | -11.205966000 | 15.133647000 | 18.260966000 |
| H  | -10.425876000 | 13.518010000 | 18.313057000 |
| H  | -9.422338000  | 15.009718000 | 18.271813000 |
| C  | -13.158595000 | 7.847672000  | 16.041721000 |
| C  | -14.189002000 | 8.659979000  | 15.221434000 |
| H  | -13.900000000 | 8.720275000  | 14.152447000 |
| H  | -15.182637000 | 8.163365000  | 15.283010000 |
| H  | -14.286296000 | 9.695476000  | 15.609223000 |
| C  | -13.617824000 | 7.792693000  | 17.511575000 |
| H  | -13.610696000 | 8.800531000  | 17.976363000 |
| H  | -14.658147000 | 7.401488000  | 17.562228000 |
| H  | -12.988094000 | 7.119490000  | 18.127921000 |
| C  | -13.054265000 | 6.433417000  | 15.440506000 |
| H  | -12.450332000 | 5.746240000  | 16.065935000 |
| H  | -14.071013000 | 5.988370000  | 15.359008000 |
| H  | -12.615481000 | 6.467338000  | 14.422184000 |
| H  | -11.120126000 | 11.278963000 | 17.610551000 |
| Na | -9.354192000  | 8.117212000  | 12.993139000 |
| H  | -12.675611000 | 11.202609000 | 17.415784000 |

### 3,3-dimethylbut-1-ene

$E_e^s = -235.7313971$

|   |              |              |              |
|---|--------------|--------------|--------------|
| C | -0.040672000 | 1.484276000  | -2.013277000 |
| C | 1.134501000  | 0.624460000  | -2.516429000 |
| H | 2.092892000  | 0.927968000  | -2.045392000 |
| H | 0.973457000  | -0.452616000 | -2.300967000 |
| H | 1.251389000  | 0.733142000  | -3.615109000 |
| C | 0.224635000  | 2.974210000  | -2.351662000 |
| H | 1.159142000  | 3.333117000  | -1.872252000 |
| H | 0.322946000  | 3.116895000  | -3.449221000 |
| H | -0.606348000 | 3.622502000  | -2.000792000 |
| C | -1.349651000 | 1.032732000  | -2.711555000 |
| H | -1.269529000 | 1.153185000  | -3.813254000 |
| H | -1.570445000 | -0.033557000 | -2.496521000 |
| H | -2.218532000 | 1.634138000  | -2.369114000 |
| C | -0.242665000 | 1.369024000  | -0.508007000 |
| H | -1.082688000 | 0.978680000  | -0.119761000 |
| C | 0.464906000  | 0.632445000  | 0.368102000  |
| H | 1.313991000  | 0.000338000  | 0.060791000  |
| H | 0.216809000  | 0.634835000  | 1.441933000  |

### IN2

$E_e^s = -2174.009880$

|    |               |              |              |
|----|---------------|--------------|--------------|
| C  | -11.807772000 | 10.658138000 | 11.110912000 |
| Ir | -11.341886000 | 11.285144000 | 15.946706000 |
| P  | -11.523416000 | 13.504959000 | 15.249911000 |
| N  | -11.649361000 | 13.386935000 | 13.543979000 |
| C  | -11.640776000 | 12.157811000 | 13.041663000 |
| N  | -11.497088000 | 11.010053000 | 13.869477000 |
| C  | -11.479340000 | 9.711504000  | 13.360328000 |
| C  | -11.655948000 | 9.519833000  | 11.948855000 |
| C  | -11.772653000 | 11.943950000 | 11.619161000 |
| H  | -11.941369000 | 8.518402000  | 11.578658000 |
| H  | -11.973512000 | 10.506601000 | 10.030247000 |

|    |               |              |              |
|----|---------------|--------------|--------------|
| H  | -11.878830000 | 12.831598000 | 10.981594000 |
| N  | -11.228797000 | 8.637422000  | 14.167591000 |
| P  | -11.186537000 | 8.969651000  | 15.857211000 |
| C  | -13.151533000 | 14.419103000 | 15.710286000 |
| C  | -13.432799000 | 15.624660000 | 14.791460000 |
| H  | -12.771978000 | 16.486580000 | 15.006933000 |
| H  | -13.306353000 | 15.344900000 | 13.726399000 |
| H  | -14.480926000 | 15.966356000 | 14.944279000 |
| C  | -14.254688000 | 13.358123000 | 15.482868000 |
| H  | -14.288889000 | 13.033066000 | 14.422744000 |
| H  | -14.088220000 | 12.459784000 | 16.113560000 |
| H  | -15.245504000 | 13.794324000 | 15.740070000 |
| C  | -13.146088000 | 14.835860000 | 17.191933000 |
| H  | -12.869139000 | 13.996521000 | 17.858587000 |
| H  | -12.451016000 | 15.681494000 | 17.386971000 |
| H  | -14.163381000 | 15.182397000 | 17.484725000 |
| C  | -9.502004000  | 8.208712000  | 16.423118000 |
| C  | -8.422488000  | 9.001919000  | 15.652275000 |
| H  | -8.563493000  | 10.095983000 | 15.779095000 |
| H  | -7.409557000  | 8.720891000  | 16.015611000 |
| H  | -8.446161000  | 8.800112000  | 14.558151000 |
| C  | -9.293562000  | 8.472807000  | 17.929934000 |
| H  | -9.993681000  | 7.891346000  | 18.560253000 |
| H  | -8.260907000  | 8.180825000  | 18.224090000 |
| H  | -9.430294000  | 9.547282000  | 18.167172000 |
| C  | -9.348944000  | 6.705973000  | 16.122317000 |
| H  | -8.291752000  | 6.391407000  | 16.273664000 |
| H  | -9.974319000  | 6.078230000  | 16.787114000 |
| H  | -9.632555000  | 6.454576000  | 15.076317000 |
| C  | -9.958788000  | 14.595850000 | 15.481828000 |
| C  | -8.821472000  | 13.778476000 | 14.825618000 |
| H  | -7.856578000  | 14.317125000 | 14.956062000 |
| H  | -8.731029000  | 12.774493000 | 15.291629000 |
| H  | -9.001328000  | 13.641665000 | 13.740116000 |
| C  | -10.071233000 | 15.956560000 | 15.768351000 |
| H  | -9.071615000  | 16.445716000 | 14.743558000 |
| H  | -10.420198000 | 15.831765000 | 13.723364000 |
| H  | -10.759976000 | 16.649951000 | 15.291324000 |
| C  | -9.645247000  | 14.781090000 | 16.979828000 |
| H  | -10.395750000 | 15.411709000 | 17.496337000 |
| H  | -9.596142000  | 13.805343000 | 17.505549000 |
| H  | -8.658488000  | 15.283103000 | 17.092616000 |
| C  | -12.687297000 | 7.950168000  | 16.514022000 |
| C  | -13.913516000 | 8.728571000  | 15.980090000 |
| H  | -13.924538000 | 8.757633000  | 14.871243000 |
| H  | -14.846232000 | 8.225998000  | 16.319766000 |
| H  | -13.919347000 | 9.775008000  | 16.349748000 |
| C  | -12.723336000 | 7.944947000  | 18.053888000 |
| H  | -12.595919000 | 8.965077000  | 18.471950000 |
| H  | -13.707051000 | 7.558457000  | 18.401445000 |
| H  | -11.945171000 | 7.287562000  | 18.492829000 |
| C  | -12.736059000 | 6.514894000  | 15.955801000 |
| H  | -11.967197000 | 5.854358000  | 16.403096000 |
| H  | -13.726656000 | 6.062139000  | 16.184207000 |
| H  | -12.605877000 | 6.516326000  | 14.854339000 |
| H  | -10.389764000 | 11.534324000 | 17.184626000 |
| Na | -9.773404000  | 7.895990000  | 12.621080000 |
| H  | -11.948136000 | 11.446794000 | 17.411195000 |
| C  | -12.828387000 | 12.006358000 | 23.170344000 |
| C  | -14.316049000 | 11.788985000 | 23.506933000 |
| C  | -12.392296000 | 13.418562000 | 23.639713000 |
| C  | -11.970601000 | 10.943201000 | 23.904196000 |

|   |               |              |              |
|---|---------------|--------------|--------------|
| C | -12.547645000 | 11.895136000 | 21.677269000 |
| H | -14.960839000 | 12.541698000 | 23.006960000 |
| H | -14.661639000 | 10.781481000 | 23.193957000 |
| H | -14.483014000 | 11.876971000 | 24.601120000 |
| H | -12.990080000 | 14.208280000 | 23.138813000 |
| H | -12.526212000 | 13.527845000 | 24.737501000 |
| H | -11.322210000 | 13.607846000 | 23.409622000 |
| H | -12.098865000 | 11.024508000 | 25.005083000 |
| H | -12.259519000 | 9.916043000  | 23.598256000 |
| H | -10.890204000 | 11.071592000 | 23.680120000 |
| C | -11.484032000 | 12.046710000 | 21.406032000 |
| H | -13.422865000 | 11.643487000 | 20.685868000 |
| H | -14.497590000 | 11.482998000 | 20.871698000 |
| H | -13.088772000 | 11.590942000 | 19.636333000 |

### TS1

$E_e^S = -2173.988552$

|    |              |              |              |
|----|--------------|--------------|--------------|
| C  | -1.261016000 | -3.542041000 | -2.662089000 |
| Ir | 0.185133000  | 0.191763000  | 0.246827000  |
| P  | 2.126719000  | -1.180194000 | 0.221464000  |
| N  | 1.704936000  | -2.441136000 | -0.828107000 |
| C  | 0.471126000  | -2.433214000 | -1.327318000 |
| N  | -0.448428000 | -1.417836000 | -1.003633000 |
| C  | -1.785752000 | -1.546040000 | -1.317667000 |
| C  | -2.212667000 | -2.595695000 | -2.207283000 |
| C  | 0.046199000  | -3.492829000 | -2.210235000 |
| H  | -3.197522000 | -2.495634000 | -2.696899000 |
| H  | -1.569091000 | -4.322895000 | -3.378210000 |
| H  | 0.799463000  | -4.240114000 | -2.492980000 |
| N  | -2.734502000 | -0.750427000 | -0.733674000 |
| P  | -2.164412000 | 0.569102000  | 0.181414000  |
| C  | 3.815325000  | -0.659120000 | -0.572450000 |
| C  | 4.682742000  | -1.872786000 | -0.978877000 |
| H  | 5.211746000  | -2.334901000 | -0.125736000 |
| H  | 4.060211000  | -2.644839000 | -1.473267000 |
| H  | 5.459492000  | -1.531628000 | -1.699337000 |
| C  | 3.410606000  | 0.048422000  | -1.884658000 |
| H  | 2.937431000  | -0.673028000 | -2.581751000 |
| H  | 2.685775000  | 0.866710000  | -1.718019000 |
| H  | 4.313213000  | 0.468814000  | -2.380826000 |
| C  | 4.603764000  | 0.275515000  | 0.362907000  |
| H  | 3.983480000  | 1.105968000  | 0.752643000  |
| H  | 5.020321000  | -0.273711000 | 1.232112000  |
| H  | 5.464677000  | 0.725701000  | -0.180109000 |
| C  | -3.045138000 | 0.392331000  | 1.918333000  |
| C  | -2.834377000 | -1.055742000 | 2.410341000  |
| H  | -1.796081000 | -1.407910000 | 2.242309000  |
| H  | -3.051714000 | -1.119388000 | 3.498922000  |
| H  | -3.539954000 | -1.767619000 | 1.923674000  |
| C  | -2.334414000 | 1.344091000  | 2.905373000  |
| H  | -2.415346000 | 2.405022000  | 2.593400000  |
| H  | -2.795727000 | 1.258968000  | 3.914698000  |
| H  | -1.257952000 | 1.094049000  | 2.986517000  |
| C  | -4.560195000 | 0.673440000  | 1.924493000  |
| H  | -4.977186000 | 0.424813000  | 2.926695000  |
| H  | -4.798527000 | 1.737654000  | 1.731946000  |
| H  | -5.106246000 | 0.061453000  | 1.175576000  |
| C  | 2.462007000  | -2.066545000 | 1.922302000  |
| C  | 1.259508000  | -3.000408000 | 2.177053000  |
| H  | 1.393337000  | -3.512308000 | 3.155686000  |

|    |              |              |              |
|----|--------------|--------------|--------------|
| H  | 0.304318000  | -2.438571000 | 2.212473000  |
| H  | 1.179123000  | -3.769654000 | 1.382595000  |
| C  | 3.728656000  | -2.944707000 | 1.918790000  |
| H  | 3.774054000  | -3.517433000 | 2.872347000  |
| H  | 3.716398000  | -3.677109000 | 1.087258000  |
| H  | 4.661048000  | -2.349892000 | 1.855903000  |
| C  | 2.549999000  | -1.010373000 | 3.042469000  |
| H  | 3.426370000  | -0.341451000 | 2.920216000  |
| H  | 1.640863000  | -0.376362000 | 3.067751000  |
| H  | 2.655523000  | -1.516516000 | 4.028403000  |
| C  | -3.025199000 | 2.035495000  | -0.787295000 |
| C  | -2.237755000 | 2.126117000  | -2.114156000 |
| H  | -2.321745000 | 1.179509000  | -2.686028000 |
| H  | -2.659895000 | 2.942835000  | -2.740493000 |
| H  | -1.161340000 | 2.326461000  | -1.964786000 |
| C  | -2.972280000 | 3.374019000  | -0.025107000 |
| H  | -1.947460000 | 3.653973000  | 0.293074000  |
| H  | -3.348369000 | 4.192655000  | -0.678889000 |
| H  | -3.612153000 | 3.365696000  | 0.881021000  |
| C  | -4.488238000 | 1.710775000  | -1.164812000 |
| H  | -5.191746000 | 1.808182000  | -0.317475000 |
| H  | -4.824065000 | 2.425197000  | -1.949237000 |
| H  | -4.562966000 | 0.685560000  | -1.579569000 |
| H  | -0.165907000 | -0.742866000 | 1.493873000  |
| Na | -3.815389000 | -2.681946000 | -0.255237000 |
| H  | 0.744790000  | 1.464134000  | -0.928017000 |
| C  | 1.691744000  | 3.634150000  | -0.765590000 |
| C  | 3.193863000  | 3.461702000  | -0.481208000 |
| C  | 1.257651000  | 5.015064000  | -0.202868000 |
| C  | 1.443858000  | 3.615078000  | -2.287450000 |
| C  | 0.763441000  | 2.604294000  | -0.034184000 |
| H  | 3.408588000  | 3.472956000  | 0.607069000  |
| H  | 3.592245000  | 2.522394000  | -0.903425000 |
| H  | 3.761008000  | 4.299472000  | -0.939808000 |
| H  | 1.395737000  | 5.060024000  | 0.897651000  |
| H  | 1.866451000  | 5.825286000  | -0.657345000 |
| H  | 0.190694000  | 5.231348000  | -0.423024000 |
| H  | 2.048733000  | 4.396211000  | -2.794724000 |
| H  | 1.715577000  | 2.634437000  | -2.730609000 |
| H  | 0.377831000  | 3.809289000  | -2.528139000 |
| H  | -0.267653000 | 2.964461000  | -0.183342000 |
| C  | 0.976067000  | 2.148065000  | 1.345588000  |
| H  | 2.010656000  | 2.058746000  | 1.714942000  |
| H  | 0.252536000  | 2.482205000  | 2.104860000  |

### IN3

$E_e^S = -2174.032563$

|    |               |              |              |
|----|---------------|--------------|--------------|
| C  | -11.547356000 | 10.585547000 | 10.962756000 |
| Ir | -11.493943000 | 11.336754000 | 15.865622000 |
| P  | -11.629743000 | 13.526584000 | 15.040459000 |
| N  | -11.545914000 | 13.358273000 | 13.352288000 |
| C  | -11.505110000 | 12.113145000 | 12.876599000 |
| N  | -11.446002000 | 10.999020000 | 13.737830000 |
| C  | -11.401422000 | 9.704448000  | 13.256880000 |
| C  | -11.486855000 | 9.470926000  | 11.838668000 |
| C  | -11.518276000 | 11.880203000 | 11.452674000 |
| H  | -11.773235000 | 8.465002000  | 11.480505000 |
| H  | -11.637755000 | 10.413646000 | 9.876384000  |
| H  | -11.553499000 | 12.759575000 | 10.795876000 |
| N  | -11.203615000 | 8.648035000  | 14.102981000 |

|    |               |              |              |
|----|---------------|--------------|--------------|
| P  | -11.241080000 | 8.989916000  | 15.784947000 |
| C  | -13.350585000 | 14.383429000 | 15.266577000 |
| C  | -13.647907000 | 15.387742000 | 14.134427000 |
| H  | -13.041812000 | 16.310363000 | 14.218565000 |
| H  | -13.447247000 | 14.936125000 | 13.143070000 |
| H  | -14.718750000 | 15.688014000 | 14.183911000 |
| C  | -14.354851000 | 13.210896000 | 15.158227000 |
| H  | -14.257186000 | 12.681034000 | 14.187737000 |
| H  | -14.214932000 | 12.474447000 | 15.978708000 |
| H  | -15.396237000 | 13.596913000 | 15.227717000 |
| C  | -13.501161000 | 15.063737000 | 16.640085000 |
| H  | -13.272293000 | 14.374177000 | 17.478220000 |
| H  | -12.853096000 | 15.958589000 | 16.737114000 |
| H  | -14.551885000 | 15.408233000 | 16.768523000 |
| C  | -9.596884000  | 8.127221000  | 16.363405000 |
| C  | -8.458049000  | 8.916156000  | 15.679399000 |
| H  | -8.494396000  | 9.992285000  | 15.943350000 |
| H  | -7.471211000  | 8.509213000  | 15.991310000 |
| H  | -8.507782000  | 8.869083000  | 14.569741000 |
| C  | -9.387860000  | 8.235813000  | 17.885649000 |
| H  | -10.162255000 | 7.689954000  | 18.458933000 |
| H  | -8.402698000  | 7.796141000  | 18.159237000 |
| H  | -9.394756000  | 9.290036000  | 18.221191000 |
| C  | -9.519843000  | 6.645030000  | 15.944651000 |
| H  | -8.479355000  | 6.267526000  | 16.065714000 |
| H  | -10.173279000 | 6.002998000  | 16.567507000 |
| H  | -9.828521000  | 6.485181000  | 14.888793000 |
| C  | -10.177363000 | 14.723038000 | 15.426454000 |
| C  | -8.924754000  | 14.049686000 | 14.821753000 |
| H  | -8.031731000  | 14.679573000 | 15.029810000 |
| H  | -8.748692000  | 13.046785000 | 15.263296000 |
| H  | -9.025863000  | 13.929801000 | 13.724602000 |
| C  | -10.371147000 | 16.095909000 | 14.753320000 |
| H  | -9.435985000  | 16.691633000 | 14.851658000 |
| H  | -10.594260000 | 15.983399000 | 13.673110000 |
| H  | -11.183841000 | 16.685131000 | 15.224332000 |
| C  | -9.986425000  | 14.876512000 | 16.948020000 |
| H  | -10.846026000 | 15.374245000 | 17.438582000 |
| H  | -9.838109000  | 13.893215000 | 17.438353000 |
| H  | -9.086013000  | 15.499121000 | 17.147840000 |
| C  | -12.803660000 | 7.991590000  | 16.347849000 |
| C  | -13.967210000 | 8.855855000  | 15.803804000 |
| H  | -13.915460000 | 8.963643000  | 14.700791000 |
| H  | -14.940292000 | 8.378594000  | 16.055223000 |
| H  | -13.967364000 | 9.871341000  | 16.255705000 |
| C  | -12.907664000 | 7.906834000  | 17.880854000 |
| H  | -12.768021000 | 8.897272000  | 18.360598000 |
| H  | -13.915744000 | 7.533339000  | 18.168416000 |
| H  | -12.167177000 | 7.203476000  | 18.313802000 |
| C  | -12.899573000 | 6.590894000  | 15.715351000 |
| H  | -12.184166000 | 5.872916000  | 16.162993000 |
| H  | -13.920003000 | 6.177479000  | 15.878969000 |
| H  | -12.716260000 | 6.639549000  | 14.622807000 |
| H  | -10.012540000 | 11.550035000 | 16.252201000 |
| Na | -9.673454000  | 7.870742000  | 12.632819000 |
| H  | -11.074856000 | 10.159029000 | 19.071623000 |
| C  | -11.439862000 | 11.731641000 | 20.522005000 |
| C  | -12.886981000 | 11.325363000 | 20.875819000 |
| C  | -11.284021000 | 13.260510000 | 20.674968000 |
| C  | -10.471657000 | 11.036370000 | 21.505575000 |
| C  | -11.069293000 | 11.271647000 | 19.071536000 |
| H  | -13.626398000 | 11.827697000 | 20.218139000 |

|   |               |              |              |
|---|---------------|--------------|--------------|
| H | -13.033647000 | 10.228317000 | 20.771520000 |
| H | -13.132672000 | 11.597553000 | 21.925225000 |
| H | -11.976693000 | 13.813983000 | 20.007815000 |
| H | -11.498529000 | 13.580832000 | 21.717581000 |
| H | -10.249705000 | 13.584657000 | 20.429644000 |
| H | -10.678153000 | 11.332141000 | 22.557177000 |
| H | -10.560315000 | 9.930115000  | 21.443490000 |
| H | -9.415084000  | 11.300792000 | 21.283424000 |
| H | -10.005851000 | 11.562470000 | 18.900445000 |
| C | -11.933271000 | 11.783923000 | 17.908350000 |
| H | -12.975980000 | 11.392038000 | 18.041733000 |
| H | -12.024312000 | 12.885255000 | 18.023655000 |

## TS2

$E_e^s = -2174.0215284$

|    |               |              |              |
|----|---------------|--------------|--------------|
| C  | -12.015996000 | 10.506039000 | 10.881918000 |
| Ir | -11.574717000 | 11.286784000 | 15.697447000 |
| P  | -11.735089000 | 13.486721000 | 14.911413000 |
| N  | -11.831487000 | 13.307367000 | 13.222779000 |
| C  | -11.840273000 | 12.055999000 | 12.774276000 |
| N  | -11.717468000 | 10.947417000 | 13.651314000 |
| C  | -11.678659000 | 9.644026000  | 13.166125000 |
| C  | -11.862308000 | 9.403337000  | 11.759863000 |
| C  | -11.971494000 | 11.802942000 | 11.359884000 |
| H  | -12.142652000 | 8.384888000  | 11.435979000 |
| H  | -12.186323000 | 10.322583000 | 9.807138000  |
| H  | -12.067768000 | 12.678014000 | 10.703805000 |
| N  | -11.390968000 | 8.594356000  | 13.987753000 |
| P  | -11.331610000 | 8.964337000  | 15.661475000 |
| C  | -13.350847000 | 14.497050000 | 15.267361000 |
| C  | -13.622115000 | 15.545321000 | 14.167832000 |
| H  | -12.939470000 | 16.414353000 | 14.231690000 |
| H  | -13.513909000 | 15.094814000 | 13.161627000 |
| H  | -14.660587000 | 15.930429000 | 14.279370000 |
| C  | -14.476481000 | 13.437589000 | 15.216491000 |
| H  | -14.510984000 | 12.937307000 | 14.226761000 |
| H  | -14.339022000 | 12.650564000 | 15.986117000 |
| H  | -15.460173000 | 13.930266000 | 15.384458000 |
| C  | -13.340081000 | 15.173701000 | 16.650786000 |
| H  | -13.136220000 | 14.456435000 | 17.472329000 |
| H  | -12.596003000 | 15.993974000 | 16.712467000 |
| H  | -14.338101000 | 15.624672000 | 16.849799000 |
| C  | -9.601460000  | 8.236612000  | 16.163833000 |
| C  | -8.573615000  | 9.080455000  | 15.376205000 |
| H  | -8.762484000  | 10.166580000 | 15.514877000 |
| H  | -7.541009000  | 8.838710000  | 15.711990000 |
| H  | -8.613773000  | 8.891722000  | 14.280552000 |
| C  | -9.326599000  | 8.456524000  | 17.664195000 |
| H  | -10.026339000 | 7.892030000  | 18.311170000 |
| H  | -8.297012000  | 8.114538000  | 17.912670000 |
| H  | -9.399426000  | 9.528847000  | 17.930778000 |
| C  | -9.422005000  | 6.746148000  | 15.818238000 |
| H  | -8.347740000  | 6.462637000  | 15.893304000 |
| H  | -9.981781000  | 6.084595000  | 16.508538000 |
| H  | -9.770534000  | 6.506624000  | 14.789666000 |
| C  | -10.159962000 | 14.570986000 | 15.141906000 |
| C  | -9.029269000  | 13.761464000 | 14.467505000 |
| H  | -8.058654000  | 14.285858000 | 14.614179000 |
| H  | -8.955700000  | 12.744089000 | 14.907290000 |
| H  | -9.210269000  | 13.653183000 | 13.379263000 |

|    |               |              |              |
|----|---------------|--------------|--------------|
| C  | -10.276807000 | 15.941700000 | 14.448944000 |
| H  | -9.280534000  | 16.438636000 | 14.439849000 |
| H  | -10.613895000 | 15.830978000 | 13.398537000 |
| H  | -10.975363000 | 16.623415000 | 14.975476000 |
| C  | -9.827239000  | 14.741401000 | 16.637770000 |
| H  | -10.605059000 | 15.304875000 | 17.190731000 |
| H  | -9.692171000  | 13.758504000 | 17.134119000 |
| H  | -8.873799000  | 15.305597000 | 16.743972000 |
| C  | -12.782563000 | 7.858539000  | 16.325204000 |
| C  | -14.045840000 | 8.590581000  | 15.813000000 |
| H  | -14.066986000 | 8.630413000  | 14.704803000 |
| H  | -14.954783000 | 8.047735000  | 16.155616000 |
| H  | -14.093069000 | 9.634721000  | 16.186482000 |
| C  | -12.816013000 | 7.801545000  | 17.861884000 |
| H  | -12.786979000 | 8.813655000  | 18.314320000 |
| H  | -13.758560000 | 7.314693000  | 18.198107000 |
| H  | -11.977820000 | 7.208994000  | 18.282906000 |
| C  | -12.772923000 | 6.434454000  | 15.736320000 |
| H  | -11.984248000 | 5.793874000  | 16.178048000 |
| H  | -13.748072000 | 5.940793000  | 15.946705000 |
| H  | -12.632654000 | 6.466136000  | 14.636940000 |
| H  | -10.762681000 | 11.599941000 | 17.069179000 |
| Na | -9.910560000  | 7.905946000  | 12.429377000 |
| H  | -11.301215000 | 10.109843000 | 19.108617000 |
| C  | -11.941781000 | 11.636388000 | 20.525669000 |
| C  | -13.429381000 | 11.223978000 | 20.577922000 |
| C  | -11.820739000 | 13.160164000 | 20.749971000 |
| C  | -11.179110000 | 10.906174000 | 21.654455000 |
| C  | -11.290589000 | 11.219566000 | 19.168245000 |
| H  | -14.032058000 | 11.749801000 | 19.808433000 |
| H  | -13.551725000 | 10.131602000 | 20.415310000 |
| H  | -13.871318000 | 11.465973000 | 21.568204000 |
| H  | -12.387253000 | 13.738724000 | 19.991187000 |
| H  | -12.220319000 | 13.445146000 | 21.746722000 |
| H  | -10.760877000 | 13.490997000 | 20.705491000 |
| H  | -11.591244000 | 11.168261000 | 22.652438000 |
| H  | -11.248450000 | 9.803142000  | 21.539900000 |
| H  | -10.101436000 | 11.177182000 | 21.653515000 |
| H  | -10.213339000 | 11.504880000 | 19.219343000 |
| C  | -11.927532000 | 11.802477000 | 17.893709000 |
| H  | -12.966919000 | 11.428901000 | 17.772814000 |
| H  | -11.965211000 | 12.903736000 | 17.974487000 |

**2,2-dimethylbutane**  
 $E_e^s = -236.9644481$

|   |              |              |              |
|---|--------------|--------------|--------------|
| C | -0.032860000 | -0.019772000 | -0.511163000 |
| C | -1.319085000 | -0.663483000 | -1.075513000 |
| H | -1.351106000 | -0.578520000 | -2.182745000 |
| H | -1.387180000 | -1.743073000 | -0.826462000 |
| H | -2.228234000 | -0.165600000 | -0.674676000 |
| C | 0.017089000  | 1.462472000  | -0.944964000 |
| H | 0.932515000  | 1.963452000  | -0.563176000 |
| H | 0.017326000  | 1.558621000  | -2.051789000 |
| H | -0.859536000 | 2.025176000  | -0.558157000 |
| C | 1.203469000  | -0.750185000 | -1.081396000 |
| H | 2.146471000  | -0.317085000 | -0.683554000 |
| H | 1.197548000  | -1.832292000 | -0.834078000 |
| H | 1.236993000  | -0.665921000 | -2.188633000 |
| C | -0.030806000 | -0.064373000 | 1.046007000  |
| H | 0.875536000  | 0.477137000  | 1.402022000  |

|   |              |              |             |
|---|--------------|--------------|-------------|
| H | -0.896916000 | 0.536965000  | 1.406115000 |
| C | -0.075960000 | -1.448509000 | 1.707544000 |
| H | 0.798212000  | -2.074408000 | 1.431013000 |
| H | -0.991402000 | -2.014244000 | 1.434923000 |
| H | -0.070360000 | -1.353232000 | 2.813445000 |

**IN4**  
 $E_e^s = -1937.041566$

|    |               |              |              |
|----|---------------|--------------|--------------|
| C  | -10.371013000 | 11.169584000 | 11.381840000 |
| Ir | -11.762345000 | 11.057992000 | 15.978430000 |
| P  | -11.837077000 | 13.350230000 | 15.651523000 |
| N  | -11.322016000 | 13.507744000 | 14.037720000 |
| C  | -11.053186000 | 12.358960000 | 13.422673000 |
| N  | -11.170041000 | 11.097218000 | 14.081732000 |
| C  | -10.871883000 | 9.894720000  | 13.434992000 |
| C  | -10.483221000 | 9.927074000  | 12.053413000 |
| C  | -10.619764000 | 12.355483000 | 12.049038000 |
| H  | -10.540793000 | 8.982058000  | 11.484374000 |
| H  | -10.100850000 | 11.186293000 | 13.312444000 |
| H  | -10.528106000 | 13.337320000 | 11.565530000 |
| N  | -10.868169000 | 8.699942000  | 14.103982000 |
| P  | -11.499695000 | 8.787381000  | 15.690165000 |
| C  | -13.563900000 | 14.197605000 | 15.629510000 |
| C  | -13.553598000 | 15.541646000 | 14.874120000 |
| H  | -13.065284000 | 16.351884000 | 15.449047000 |
| H  | -13.029681000 | 15.438309000 | 13.902380000 |
| H  | -14.600713000 | 15.862346000 | 14.674981000 |
| C  | -14.460885000 | 13.204673000 | 14.853435000 |
| H  | -14.106731000 | 13.076177000 | 13.810078000 |
| H  | -14.465532000 | 12.202708000 | 15.333070000 |
| H  | -15.502721000 | 13.594632000 | 14.818454000 |
| C  | -14.109804000 | 14.365820000 | 17.059921000 |
| H  | -14.069960000 | 13.412525000 | 17.630220000 |
| H  | -13.558490000 | 15.138138000 | 17.634720000 |
| H  | -15.175047000 | 14.685566000 | 17.020738000 |
| C  | -10.151546000 | 7.883608000  | 16.744358000 |
| C  | -8.941186000  | 8.845142000  | 16.744858000 |
| H  | -9.245045000  | 9.870990000  | 17.045880000 |
| H  | -8.151581000  | 8.470408000  | 17.433458000 |
| H  | -8.479732000  | 8.941855000  | 15.736118000 |
| C  | -10.645847000 | 7.729983000  | 18.197148000 |
| H  | -11.463998000 | 6.987110000  | 18.284512000 |
| H  | -9.814387000  | 7.383760000  | 18.850686000 |
| H  | -11.010921000 | 8.697317000  | 18.603479000 |
| C  | -9.709011000  | 6.516745000  | 16.186594000 |
| H  | -8.778056000  | 6.178358000  | 16.694780000 |
| H  | -10.470288000 | 5.727526000  | 16.332638000 |
| H  | -9.504187000  | 6.562739000  | 15.094067000 |
| C  | -10.545331000 | 14.359325000 | 16.659018000 |
| C  | -9.183061000  | 13.757153000 | 16.246497000 |
| H  | -8.373516000  | 14.215108000 | 16.857722000 |
| H  | -9.173241000  | 12.657431000 | 16.409003000 |
| H  | -8.968881000  | 13.948140000 | 15.175806000 |
| C  | -10.547759000 | 15.865538000 | 16.342682000 |
| H  | -9.658696000  | 16.346571000 | 16.809573000 |
| H  | -10.497226000 | 16.047467000 | 15.249892000 |
| H  | -11.444108000 | 16.379852000 | 16.744757000 |
| C  | -10.764678000 | 14.110083000 | 18.165842000 |
| H  | -11.718835000 | 14.535006000 | 18.536656000 |
| H  | -10.759749000 | 13.021777000 | 18.392507000 |

|    |               |              |              |              |                            |
|----|---------------|--------------|--------------|--------------|----------------------------|
| H  | -9.942514000  | 14.581917000 | 18.749470000 | 13.564736000 |                            |
| C  | -13.134028000 | 7.761620000  | 15.623673000 | C            | -10.399223000 9.929720000  |
| C  | -13.922435000 | 8.399427000  | 14.456941000 | 12.187744000 |                            |
| H  | -13.413097000 | 8.234613000  | 13.486478000 | C            | -10.770515000 12.326972000 |
| H  | -14.936762000 | 7.945415000  | 14.404263000 | 12.106156000 |                            |
| H  | -14.032944000 | 9.495177000  | 14.603622000 | H            | -10.347696000 8.963217000  |
| C  | -13.925363000 | 7.976073000  | 16.930810000 | 11.656878000 |                            |
| H  | -14.057131000 | 9.059815000  | 17.138612000 | H            | -10.130381000 11.163162000 |
| H  | -14.937628000 | 7.523195000  | 16.836364000 | 10.405158000 |                            |
| H  | -13.438575000 | 7.511484000  | 17.811833000 | H            | -10.772557000 13.299435000 |
| C  | -12.936660000 | 6.262455000  | 15.339245000 | 11.596140000 |                            |
| H  | -12.510699000 | 5.717715000  | 16.206713000 | N            | -10.717952000 8.736550000  |
| H  | -13.919823000 | 5.791248000  | 15.114294000 | 14.259950000 |                            |
| H  | -12.280384000 | 6.099685000  | 14.459308000 | P            | -11.482215000 8.775860000  |
| Na | -8.817058000  | 8.365903000  | 13.226854000 | 15.785438000 |                            |

**Cyclooctane**  
 $E_e^s = -314.3326228$

|   |              |              |              |              |                            |
|---|--------------|--------------|--------------|--------------|----------------------------|
| C | -0.525544000 | 0.010444000  | -4.514048000 | 15.808634000 | 14.242467000               |
| C | 0.458347000  | 0.846474000  | -3.665932000 | C            | -13.668578000 15.466032000 |
| C | -1.668470000 | -0.481979000 | -1.180250000 | 14.871660000 |                            |
| C | 1.201588000  | 0.049177000  | -2.565130000 | H            | -13.100557000 16.333135000 |
| C | -0.681602000 | 0.650298000  | -0.817871000 | 15.260491000 |                            |
| C | 0.816011000  | 0.433264000  | -1.119652000 | H            | -13.270490000 15.212774000 |
| H | 0.051921000  | -0.560488000 | -5.276652000 | 13.869102000 |                            |
| H | -0.087786000 | 1.696218000  | -3.201223000 | H            | -14.729454000 15.785796000 |
| H | 1.025924000  | -1.038461000 | -2.714963000 | 14.764488000 |                            |
| H | -1.198167000 | -1.473939000 | -0.983049000 | C            | -14.595107000 13.177251000 |
| H | -0.760612000 | 0.847182000  | 0.274084000  | 15.291706000 |                            |
| H | -1.171425000 | 0.707239000  | -5.095015000 | H            | -14.369453000 12.899654000 |
| H | 1.186906000  | 1.323230000  | -4.356281000 | 14.241721000 |                            |
| H | -2.518264000 | -0.418163000 | -0.465528000 | H            | -14.551332000 12.245945000 |
| H | 2.300411000  | 0.175037000  | -2.672064000 | 15.895165000 |                            |
| H | -1.033143000 | 1.591245000  | -1.299359000 | H            | -15.630263000 13.585301000 |
| H | 1.214570000  | -0.344373000 | -0.429250000 | 15.325412000 |                            |
| H | 1.346845000  | 1.372720000  | -0.842800000 | C            | -13.972984000 14.649755000 |
| C | -1.422649000 | -1.001388000 | -3.770795000 | 17.245972000 |                            |
| H | -0.808500000 | -1.855657000 | -3.404981000 | H            | -13.888078000 13.803528000 |
| H | -2.097924000 | -1.447591000 | -4.533869000 | 17.959014000 |                            |
| C | -2.287421000 | -0.484586000 | -2.599388000 | H            | -13.345837000 15.483751000 |
| H | -2.673892000 | 0.535236000  | -2.833142000 | 17.622392000 |                            |
| H | -3.190997000 | -1.131136000 | -2.548396000 | H            | -15.029508000 14.998768000 |

**IN5**  
 $E_e^s = -2251.401290$

|    |               |              |              |               |             |
|----|---------------|--------------|--------------|---------------|-------------|
| C  | -10.403626000 | 11.153666000 | 16.252777000 | 17.571575000  | 9.715935000 |
|    | 11.473955000  |              | C            | -8.363026000  | 8.304247000 |
| Ir | -11.781359000 | 11.056427000 | 17.893665000 | 17.893665000  |             |
|    | 16.145452000  |              | H            | -8.508756000  | 9.012205000 |
| P  | -11.883759000 | 13.358961000 | 16.252777000 | 16.252777000  |             |
|    | 15.727525000  |              | C            | -10.883335000 | 7.329003000 |
| N  | -11.521270000 | 13.469933000 | 18.198658000 | 18.198658000  |             |
|    | 14.072509000  |              | H            | -11.640666000 | 6.534081000 |
| C  | -11.183126000 | 12.325952000 | 18.045827000 | 18.045827000  |             |
|    | 13.487832000  |              | H            | -10.110475000 | 6.918653000 |
| N  | -11.194942000 | 11.091826000 | 18.886342000 | 18.886342000  |             |
|    | 14.192615000  |              | H            | -11.373566000 | 8.175514000 |
| C  | -10.805466000 | 9.910233000  | 18.719547000 | 18.719547000  |             |
|    |               |              | C            | -9.645180000  | 6.523141000 |
|    |               |              | 16.167935000 |               |             |
|    |               |              | H            | -8.779538000  | 6.133419000 |

|                 |              |
|-----------------|--------------|
| 16.749470000    |              |
| H -10.377506000 | 5.699888000  |
| 16.071129000    |              |
| H -9.294414000  | 6.758186000  |
| 15.140465000    |              |
| C -10.483715000 | 14.453309000 |
| 16.492239000    |              |
| C -9.175904000  | 13.765023000 |
| 16.038297000    |              |
| H -8.304718000  | 14.280574000 |
| 16.501354000    |              |
| H -9.165062000  | 12.696524000 |
| 16.345971000    |              |
| H -9.063407000  | 13.808254000 |
| 14.936460000    |              |
| C -10.504734000 | 15.896356000 |
| 15.955900000    |              |
| H -9.561941000  | 16.414474000 |
| 16.243692000    |              |
| H -10.580181000 | 15.907264000 |
| 14.849858000    |              |
| H -11.342601000 | 16.489877000 |
| 16.375219000    |              |
| C -10.536388000 | 14.441431000 |
| 18.029908000    |              |
| H -11.459811000 | 14.903087000 |
| 18.433031000    |              |
| H -10.461984000 | 13.406331000 |
| 18.420765000    |              |
| H -9.675893000  | 15.016336000 |
| 18.440422000    |              |
| C -13.090943000 | 7.735689000  |
| 15.476876000    |              |
| C -13.793211000 | 8.474042000  |
| 14.314093000    |              |
| H -13.199451000 | 8.420716000  |
| 13.379944000    |              |
| H -14.783647000 | 8.004062000  |
| 14.123604000    |              |
| H -13.950889000 | 9.545927000  |
| 14.559921000    |              |
| C -14.018191000 | 7.769838000  |
| 16.705406000    |              |
| H -14.259121000 | 8.816397000  |
| 16.982504000    |              |
| H -14.976705000 | 7.257082000  |
| 16.466237000    |              |
| H -13.587350000 | 7.264640000  |
| 17.592871000    |              |
| C -12.802998000 | 6.285481000  |
| 15.049549000    |              |
| H -12.441604000 | 5.657799000  |
| 15.890335000    |              |
| H -13.739203000 | 5.813746000  |
| 14.674799000    |              |
| H -12.056618000 | 6.250538000  |
| 14.229517000    |              |
| C -14.135284000 | 10.984979000 |
| 19.000281000    |              |
| C -12.616864000 | 11.209265000 |
| 18.792214000    |              |
| C -13.307558000 | 12.569212000 |

|                 |              |
|-----------------|--------------|
| 22.073752000    |              |
| C -11.702827000 | 10.671007000 |
| 19.917287000    |              |
| C -12.010608000 | 12.909847000 |
| 21.310030000    |              |
| C -11.108939000 | 11.745422000 |
| 20.857446000    |              |
| H -14.394984000 | 9.981656000  |
| 18.600574000    |              |
| H -12.397190000 | 12.274487000 |
| 18.608148000    |              |
| H -12.263630000 | 9.914667000  |
| 20.508219000    |              |
| H -13.140350000 | 11.683350000 |
| 22.730688000    |              |
| H -11.381439000 | 13.559170000 |
| 21.957747000    |              |
| H -14.688871000 | 11.703815000 |
| 18.358519000    |              |
| H -12.370081000 | 10.562684000 |
| 17.849727000    |              |
| H -13.519183000 | 13.410719000 |
| 22.769457000    |              |
| H -10.850158000 | 10.119901000 |
| 19.472310000    |              |
| H -12.267604000 | 13.549224000 |
| 20.435693000    |              |
| H -10.706001000 | 11.229942000 |
| 21.758676000    |              |
| H -10.222758000 | 12.195099000 |
| 20.356699000    |              |
| C -14.705483000 | 11.039251000 |
| 20.434214000    |              |
| H -14.287534000 | 10.205804000 |
| 21.043670000    |              |
| H -15.786204000 | 10.796466000 |
| 20.332063000    |              |
| C -14.586364000 | 12.350920000 |
| 21.237379000    |              |
| H -14.734697000 | 13.222801000 |
| 20.558412000    |              |
| H -15.443785000 | 12.384484000 |
| 21.945267000    |              |
| Na -8.581530000 | 8.706555000  |
| 13.524951000    |              |

### TS3

$$E_e^s = -2251.3855613$$

|                  |              |              |
|------------------|--------------|--------------|
| C -11.625478000  | 10.972666000 | 11.216456000 |
| Ir -12.031737000 | 11.144596000 | 16.092222000 |
| P -11.955733000  | 13.427948000 | 15.577250000 |
| N -11.761623000  | 13.462763000 | 13.887936000 |
| C -11.731900000  | 12.276580000 | 13.291150000 |
| N -11.790956000  | 11.067928000 | 14.032785000 |
| C -11.650944000  | 9.836538000  | 13.404362000 |
| C -11.620285000  | 9.769748000  | 11.966402000 |
| C -11.635812000  | 12.199810000 | 11.853349000 |
| H -11.863438000  | 8.806935000  | 11.481459000 |
| H -11.629841000  | 10.924683000 | 10.113979000 |
| H -11.608688000  | 13.151057000 | 11.305759000 |



|              |               |              |              |               |              |
|--------------|---------------|--------------|--------------|---------------|--------------|
| H            | -14.297198000 | 13.139922000 | H            | -10.167075000 | 13.526994000 |
| 14.282204000 |               |              | 18.240211000 |               |              |
| H            | -14.510553000 | 12.594809000 | H            | -9.292795000  | 15.093715000 |
| 15.983128000 |               |              | 18.158214000 |               |              |
| H            | -15.488941000 | 13.957222000 | C            | -13.135309000 | 7.764323000  |
| 15.348602000 |               |              | 16.108663000 |               |              |
| C            | -13.688523000 | 14.997833000 | C            | -14.159296000 | 8.510077000  |
| 17.196798000 |               |              | 15.220507000 |               |              |
| H            | -13.597034000 | 14.186183000 | H            | -13.801411000 | 8.607399000  |
| 17.946842000 |               |              | 14.176068000 |               |              |
| H            | -13.001935000 | 15.817372000 | H            | -15.119313000 | 7.948211000  |
| 17.493240000 |               |              | 15.207402000 |               |              |
| H            | -14.723842000 | 15.401364000 | H            | -14.377460000 | 9.528843000  |
| 17.261585000 |               |              | 15.606306000 |               |              |
| C            | -10.040007000 | 7.949443000  | C            | -13.701463000 | 7.649063000  |
| 16.812842000 |               |              | 17.535908000 |               |              |
| C            | -8.922551000  | 8.994727000  | H            | -13.809226000 | 8.639119000  |
| 17.024743000 |               |              | 18.018481000 |               |              |
| H            | -9.205557000  | 9.752735000  | H            | -14.713225000 | 7.187118000  |
| 17.781332000 |               |              | 17.495053000 |               |              |
| H            | -7.994891000  | 8.489481000  | H            | -13.080407000 | 7.012729000  |
| 17.375897000 |               |              | 18.194470000 |               |              |
| H            | -8.685171000  | 9.538596000  | C            | -12.901458000 | 6.362394000  |
| 16.085297000 |               |              | 15.515687000 |               |              |
| C            | -10.419393000 | 7.330324000  | H            | -12.260024000 | 5.730346000  |
| 18.174335000 |               |              | 16.164402000 |               |              |
| H            | -11.063749000 | 6.435620000  | H            | -13.875430000 | 5.832900000  |
| 18.060556000 |               |              | 15.413282000 |               |              |
| H            | -9.496929000  | 7.004707000  | H            | -12.443014000 | 6.429517000  |
| 18.704947000 |               |              | 14.507776000 |               |              |
| H            | -10.941738000 | 8.054848000  | C            | -13.953964000 | 11.317475000 |
| 18.828551000 |               |              | 18.373459000 |               |              |
| C            | -9.468326000  | 6.829571000  | C            | -12.404111000 | 11.500660000 |
| 15.909889000 |               |              | 18.352351000 |               |              |
| H            | -8.783931000  | 6.188413000  | C            | -13.541660000 | 11.699305000 |
| 16.508402000 |               |              | 21.854978000 |               |              |
| H            | -10.240933000 | 6.177219000  | C            | -11.656958000 | 10.668693000 |
| 15.461484000 |               |              | 19.426006000 |               |              |
| H            | -8.833653000  | 7.246981000  | C            | -12.237202000 | 12.366814000 |
| 15.096534000 |               |              | 21.369984000 |               |              |
| C            | -10.256460000 | 14.534515000 | C            | -11.205205000 | 11.457402000 |
| 16.283503000 |               |              | 20.677573000 |               |              |
| C            | -9.005738000  | 13.806684000 | H            | -14.250718000 | 10.615526000 |
| 15.741324000 |               |              | 17.553498000 |               |              |
| H            | -8.092292000  | 14.341494000 | H            | -12.202032000 | 12.563987000 |
| 16.083721000 |               |              | 18.605468000 |               |              |
| H            | -8.948696000  | 12.761040000 | H            | -12.274033000 | 9.796620000  |
| 16.109088000 |               |              | 19.740438000 |               |              |
| H            | -9.006752000  | 13.783019000 | H            | -13.334593000 | 10.650792000 |
| 14.633201000 |               |              | 22.174588000 |               |              |
| C            | -10.262410000 | 15.970237000 | H            | -11.727844000 | 12.832373000 |
| 15.722726000 |               |              | 22.242799000 |               |              |
| H            | -9.288107000  | 16.458021000 | H            | -14.435352000 | 12.279701000 |
| 15.950713000 |               |              | 18.094031000 |               |              |
| H            | -10.397052000 | 15.970910000 | H            | -10.370083000 | 11.391191000 |
| 14.622412000 |               |              | 16.772028000 |               |              |
| H            | -11.054175000 | 16.597551000 | H            | -13.875390000 | 12.223385000 |
| 16.179305000 |               |              | 22.777961000 |               |              |
| C            | -10.206168000 | 14.553247000 | H            | -10.740093000 | 10.219513000 |
| 17.823117000 |               |              | 18.994521000 |               |              |
| H            | -11.077514000 | 15.070338000 | H            | -12.497483000 | 13.217542000 |
| 18.271983000 |               |              | 20.700091000 |               |              |

|    |               |              |
|----|---------------|--------------|
| H  | -10.803123000 | 10.737314000 |
|    | 21.428338000  |              |
| H  | -10.339173000 | 12.098099000 |
|    | 20.391609000  |              |
| C  | -14.686869000 | 10.798188000 |
|    | 19.638148000  |              |
| H  | -14.293370000 | 9.800662000  |
|    | 19.939041000  |              |
| H  | -15.737494000 | 10.604833000 |
|    | 19.324728000  |              |
| C  | -14.738071000 | 11.710758000 |
|    | 20.881025000  |              |
| H  | -14.931467000 | 12.760794000 |
|    | 20.558012000  |              |
| H  | -15.636588000 | 11.415728000 |
|    | 21.468301000  |              |
| Na | -9.469361000  | 8.139177000  |
|    | 13.019107000  |              |

#### TS4

$E_e^s = -2251.3770291$

|    |               |              |              |
|----|---------------|--------------|--------------|
| C  | -11.762731000 | 10.888558000 | 11.573788000 |
| Ir | -12.033214000 | 11.414617000 | 16.512185000 |
| P  | -11.869499000 | 13.666214000 | 15.762646000 |
| N  | -11.892690000 | 13.550405000 | 14.079019000 |
| C  | -11.874908000 | 12.324322000 | 13.555183000 |
| N  | -11.883361000 | 11.181570000 | 14.367258000 |
| C  | -11.677942000 | 9.929293000  | 13.840254000 |
| C  | -11.659452000 | 9.749307000  | 12.409094000 |
| C  | -11.832550000 | 12.157494000 | 12.122863000 |
| H  | -11.833953000 | 8.735915000  | 12.004496000 |
| H  | -11.791029000 | 10.759246000 | 10.478289000 |
| H  | -11.866234000 | 13.067645000 | 11.509515000 |
| N  | -11.412109000 | 8.859524000  | 14.644439000 |
| P  | -11.673571000 | 9.033323000  | 16.323902000 |
| C  | -13.305824000 | 14.951352000 | 16.026757000 |
| C  | -13.189677000 | 16.143187000 | 15.046562000 |
| H  | -12.436167000 | 16.888987000 | 15.356532000 |
| H  | -12.941355000 | 15.783645000 | 14.028173000 |
| H  | -14.170519000 | 16.666984000 | 15.004195000 |
| C  | -14.607044000 | 14.208409000 | 15.639917000 |
| H  | -14.572433000 | 13.899937000 | 14.575458000 |
| H  | -14.797362000 | 13.300431000 | 16.241292000 |
| H  | -15.471101000 | 14.896378000 | 15.771432000 |
| C  | -13.361898000 | 15.466018000 | 17.478714000 |
| H  | -13.427397000 | 14.650130000 | 18.227370000 |
| H  | -12.474012000 | 16.081373000 | 17.731939000 |
| H  | -14.256483000 | 16.114203000 | 17.614161000 |
| C  | -10.034912000 | 8.242987000  | 17.075928000 |
| C  | -9.006691000  | 9.364993000  | 17.325101000 |
| H  | -9.365977000  | 10.098184000 | 18.072304000 |
| H  | -8.057503000  | 8.917134000  | 17.697554000 |
| H  | -8.781311000  | 9.934563000  | 16.400099000 |
| C  | -10.316385000 | 7.537419000  | 18.419513000 |
| H  | -10.866336000 | 6.585475000  | 18.288385000 |
| H  | -9.352206000  | 7.293246000  | 18.918688000 |
| H  | -10.893554000 | 8.179308000  | 19.113169000 |
| C  | -9.375091000  | 7.221612000  | 16.116358000 |
| H  | -8.619166000  | 6.626464000  | 16.675182000 |
| H  | -10.087824000 | 6.513519000  | 15.652362000 |

|    |               |              |              |
|----|---------------|--------------|--------------|
| H  | -8.796754000  | 7.740388000  | 15.318396000 |
| C  | -10.148983000 | 14.495216000 | 16.151291000 |
| C  | -9.105354000  | 13.700378000 | 15.337143000 |
| H  | -8.088803000  | 14.087463000 | 15.570933000 |
| H  | -9.133291000  | 12.620588000 | 15.590214000 |
| H  | -9.283687000  | 13.808759000 | 14.248517000 |
| C  | -10.055617000 | 15.970130000 | 15.714461000 |
| H  | -9.001840000  | 16.311192000 | 15.826411000 |
| H  | -10.340037000 | 16.103543000 | 14.652023000 |
| H  | -10.678346000 | 16.641204000 | 16.338933000 |
| C  | -9.831013000  | 14.371729000 | 17.654185000 |
| H  | -10.557079000 | 14.922746000 | 18.287495000 |
| H  | -9.824889000  | 13.310858000 | 17.975040000 |
| H  | -8.824830000  | 14.801529000 | 17.858652000 |
| C  | -13.106831000 | 7.697608000  | 16.530009000 |
| C  | -14.295114000 | 8.332274000  | 15.772533000 |
| H  | -14.038362000 | 8.529725000  | 14.712307000 |
| H  | -15.161456000 | 7.634743000  | 15.793258000 |
| H  | -14.612510000 | 9.291983000  | 16.224997000 |
| C  | -13.519284000 | 7.398651000  | 17.987055000 |
| H  | -13.506696000 | 8.298175000  | 18.632240000 |
| H  | -14.555805000 | 6.995100000  | 18.006859000 |
| H  | -12.869650000 | 6.641669000  | 18.465245000 |
| C  | -12.749081000 | 6.369749000  | 15.831157000 |
| H  | -11.964586000 | 5.802134000  | 16.373693000 |
| H  | -13.650265000 | 5.717132000  | 15.796348000 |
| H  | -12.413678000 | 6.548396000  | 14.789761000 |
| C  | -13.632986000 | 11.805727000 | 18.081522000 |
| C  | -12.265108000 | 11.802019000 | 18.622820000 |
| C  | -14.660722000 | 11.115330000 | 21.218449000 |
| C  | -11.859127000 | 10.818016000 | 19.710321000 |
| C  | -13.415340000 | 12.001309000 | 21.463231000 |
| C  | -12.048372000 | 11.367648000 | 21.142875000 |
| H  | -13.743432000 | 11.396022000 | 16.561278000 |
| H  | -11.873357000 | 12.812988000 | 18.844800000 |
| H  | -12.422889000 | 9.867479000  | 19.588883000 |
| H  | -14.385980000 | 10.039056000 | 21.314475000 |
| H  | -13.394224000 | 12.307509000 | 22.532130000 |
| H  | -14.043680000 | 12.817700000 | 17.924778000 |
| H  | -10.407196000 | 11.448796000 | 16.459787000 |
| H  | -15.389370000 | 11.300523000 | 22.037940000 |
| H  | -10.788809000 | 10.542624000 | 19.594982000 |
| H  | -13.529301000 | 12.950276000 | 20.892157000 |
| H  | -11.848883000 | 10.545533000 | 21.868550000 |
| H  | -11.262661000 | 12.133178000 | 21.336404000 |
| C  | -14.748840000 | 10.885712000 | 18.577509000 |
| H  | -14.385662000 | 9.846177000  | 18.684993000 |
| H  | -15.538424000 | 10.842521000 | 17.795295000 |
| C  | -15.420232000 | 11.337031000 | 19.893899000 |
| H  | -15.694569000 | 12.414902000 | 19.812665000 |
| H  | -16.388538000 | 10.793134000 | 19.966190000 |
| Na | -9.726435000  | 8.341553000  | 13.252329000 |

#### IN7

$E_e^s = -2251.389966$

|    |               |              |              |
|----|---------------|--------------|--------------|
| C  | -10.845687000 | 11.432641000 | 10.270228000 |
| Ir | -11.439246000 | 10.907383000 | 15.104979000 |
| P  | -11.789250000 | 13.202952000 | 14.884599000 |
| N  | -11.563985000 | 13.491066000 | 13.209595000 |
| C  | -11.281837000 | 12.426736000 | 12.467226000 |

|   |               |              |              |    |               |              |              |
|---|---------------|--------------|--------------|----|---------------|--------------|--------------|
| N | -11.145559000 | 11.129887000 | 13.035687000 | C  | -11.093810000 | 10.486867000 | 21.635363000 |
| C | -10.850112000 | 9.999963000  | 12.272821000 | C  | -13.854914000 | 11.642673000 | 23.533459000 |
| C | -10.708868000 | 10.142748000 | 10.851935000 | C  | -10.939637000 | 10.466766000 | 23.134256000 |
| C | -11.095360000 | 12.553954000 | 11.040499000 | C  | -12.571579000 | 12.500753000 | 23.390248000 |
| H | -10.767392000 | 9.240112000  | 10.217114000 | C  | -11.241158000 | 11.835399000 | 23.797388000 |
| H | -10.766964000 | 11.534455000 | 9.174023000  | H  | -10.221942000 | 10.810806000 | 21.037885000 |
| H | -11.195535000 | 13.556695000 | 10.604414000 | H  | -11.622727000 | 9.703655000  | 23.568335000 |
| N | -10.624888000 | 8.786512000  | 12.861268000 | H  | -13.715953000 | 10.882826000 | 24.337786000 |
| P | -10.976457000 | 8.702408000  | 14.544974000 | H  | -12.679301000 | 13.414889000 | 24.014198000 |
| C | -13.587854000 | 13.823419000 | 15.162970000 | H  | -12.278135000 | 10.321122000 | 19.893574000 |
| C | -13.845590000 | 15.201810000 | 14.522655000 | H  | -10.826498000 | 10.913521000 | 16.566409000 |
| H | -13.375361000 | 16.028324000 | 15.090039000 | H  | -14.673049000 | 12.300103000 | 23.900935000 |
| H | -13.464560000 | 15.229503000 | 13.482070000 | H  | -9.910215000  | 10.155894000 | 23.416327000 |
| H | -14.940784000 | 15.398671000 | 14.501107000 | H  | -12.497990000 | 12.866164000 | 22.342221000 |
| C | -14.464449000 | 12.772649000 | 14.440714000 | H  | -11.221861000 | 11.693532000 | 24.902110000 |
| H | -14.243292000 | 12.741794000 | 13.354205000 | H  | -10.414211000 | 12.545128000 | 23.569512000 |
| H | -14.300971000 | 11.755601000 | 14.854906000 | C  | -13.542098000 | 9.795863000  | 21.667338000 |
| H | -15.537669000 | 13.038625000 | 14.565529000 | H  | -13.330084000 | 9.065866000  | 22.481978000 |
| C | -13.937953000 | 13.833326000 | 16.663097000 | H  | -14.170330000 | 9.253016000  | 20.929169000 |
| H | -13.685052000 | 12.867755000 | 17.148816000 | C  | -14.387798000 | 10.952333000 | 22.258418000 |
| H | -13.417970000 | 14.645454000 | 17.210698000 | H  | -14.547082000 | 11.723635000 | 21.470740000 |
| H | -15.030663000 | 14.001896000 | 16.788978000 | H  | -15.398326000 | 10.546971000 | 22.490156000 |
| C | -9.364962000  | 7.938741000  | 15.288859000 | Na | -8.782799000  | 8.594125000  | 11.584446000 |
| C | -8.274137000  | 9.008214000  | 15.051008000 | H  | -12.362269000 | 10.663171000 | 16.377777000 |
| H | -8.589467000  | 9.996251000  | 15.447104000 |    |               |              |              |
| H | -7.325366000  | 8.702405000  | 15.544407000 |    |               |              |              |
| H | -8.052531000  | 9.156033000  | 13.970297000 |    |               |              |              |
| C | -9.528314000  | 7.756385000  | 16.812482000 |    |               |              |              |
| H | -10.231270000 | 6.938254000  | 17.063798000 |    |               |              |              |
| H | -8.547056000  | 7.500408000  | 17.270198000 |    |               |              |              |
| H | -9.898048000  | 8.687069000  | 17.289073000 |    |               |              |              |
| C | -8.927992000  | 6.610882000  | 14.640903000 |    |               |              |              |
| H | -7.887716000  | 6.360055000  | 14.947768000 |    |               |              |              |
| H | -9.571520000  | 5.761950000  | 14.942685000 |    |               |              |              |
| H | -8.955480000  | 6.655321000  | 13.529605000 |    |               |              |              |
| C | -10.465951000 | 14.344579000 | 15.683628000 |    |               |              |              |
| C | -9.120830000  | 13.798001000 | 15.150040000 |    |               |              |              |
| H | -8.282741000  | 14.373729000 | 15.602041000 |    |               |              |              |
| H | -8.993730000  | 12.725791000 | 15.410135000 |    |               |              |              |
| H | -9.057662000  | 13.897199000 | 14.047440000 |    |               |              |              |
| C | -10.611602000 | 15.816416000 | 15.253144000 |    |               |              |              |
| H | -9.699762000  | 16.381552000 | 15.550219000 |    |               |              |              |
| H | -10.727320000 | 15.900380000 | 14.153639000 |    |               |              |              |
| H | -11.475118000 | 16.313060000 | 15.738831000 |    |               |              |              |
| C | -10.490288000 | 14.210048000 | 17.218867000 |    |               |              |              |
| H | -11.403473000 | 14.647714000 | 17.668914000 |    |               |              |              |
| H | -10.427623000 | 13.147548000 | 17.532112000 |    |               |              |              |
| H | -9.618644000  | 14.748989000 | 17.652604000 |    |               |              |              |
| C | -12.457129000 | 7.469113000  | 14.606522000 |    |               |              |              |
| C | -13.590724000 | 8.228754000  | 13.876697000 |    |               |              |              |
| H | -13.327895000 | 8.431903000  | 12.818670000 |    |               |              |              |
| H | -14.515980000 | 7.611205000  | 13.890587000 |    |               |              |              |
| H | -13.806495000 | 9.200018000  | 14.369175000 |    |               |              |              |
| C | -12.887041000 | 7.204803000  | 16.062425000 |    |               |              |              |
| H | -13.002500000 | 8.153034000  | 16.627188000 |    |               |              |              |
| H | -13.868096000 | 6.680098000  | 16.070819000 |    |               |              |              |
| H | -12.169212000 | 6.559730000  | 16.608351000 |    |               |              |              |
| C | -12.186328000 | 6.149276000  | 13.860293000 |    |               |              |              |
| H | -11.494788000 | 5.481445000  | 14.411676000 |    |               |              |              |
| H | -13.141112000 | 5.592174000  | 13.731733000 |    |               |              |              |
| H | -11.767431000 | 6.342182000  | 12.851264000 |    |               |              |              |
| C | -12.251767000 | 10.214268000 | 20.993536000 |    |               |              |              |

  

|                                          |              |              |              |  |  |  |  |
|------------------------------------------|--------------|--------------|--------------|--|--|--|--|
| <b>Cyclooctene</b>                       |              |              |              |  |  |  |  |
| <b><math>E_e^s = -313.1029338</math></b> |              |              |              |  |  |  |  |
| C                                        | 1.220972000  | -0.201262000 | -2.727182000 |  |  |  |  |
| C                                        | 2.023562000  | 0.867863000  | -1.967472000 |  |  |  |  |
| C                                        | -0.172110000 | -0.414834000 | 0.608496000  |  |  |  |  |
| C                                        | 2.967070000  | 0.352829000  | -0.866333000 |  |  |  |  |
| C                                        | 1.255494000  | -0.248923000 | 1.085072000  |  |  |  |  |
| C                                        | 2.458720000  | 0.021046000  | 0.522464000  |  |  |  |  |
| H                                        | 1.923042000  | -0.846443000 | -3.302707000 |  |  |  |  |
| H                                        | 1.338762000  | 1.628231000  | -1.530995000 |  |  |  |  |
| H                                        | 3.526079000  | -0.536641000 | -1.250225000 |  |  |  |  |
| H                                        | -0.479976000 | -1.432080000 | 0.953728000  |  |  |  |  |
| H                                        | 1.316353000  | -0.437937000 | 2.175112000  |  |  |  |  |
| H                                        | 0.592308000  | 0.314005000  | -3.489113000 |  |  |  |  |
| H                                        | 2.637683000  | 1.421277000  | -2.711221000 |  |  |  |  |
| H                                        | -0.809345000 | 0.269954000  | 1.216931000  |  |  |  |  |
| H                                        | 3.763390000  | 1.116945000  | -0.716648000 |  |  |  |  |
| H                                        | 3.294843000  | -0.005317000 | 1.248443000  |  |  |  |  |
| C                                        | 0.318760000  | -1.087811000 | -1.850446000 |  |  |  |  |
| H                                        | 0.945278000  | -1.805128000 | -1.274754000 |  |  |  |  |
| H                                        | -0.313397000 | -1.714628000 | -2.515582000 |  |  |  |  |
| C                                        | -0.565362000 | -0.278941000 | -0.871189000 |  |  |  |  |
| H                                        | -0.568965000 | 0.794156000  | -1.163979000 |  |  |  |  |
| H                                        | -1.624956000 | -0.602189000 | -0.956683000 |  |  |  |  |

## References

1. Y. Pan, C. Guan, H. Li, P. Chakraborty, C. Zhou, K.-W. Huang, *Dalton Trans.* 2019, **48**, 12812-12816.
2. M.J. Frisch, et.al., Gaussian 16, Revision C.02, Gaussian, Inc., Wallingford CT, 2019.
3. a) A. Becke, *Phys. Rev. A*, 1988, **38**, 3098-3100; b) J. P. Perdew, *Phys. Rev. B*, 1986, **33**, 8822-8824; c) J. P. Perdew, *Phys. Rev. B*, 1986, **34**, 7406-7406.
4. F. Weigend, R. Ahlrichs, *Phys. Chem. Chem. Phys.* 2005, **7**, 3297–3305.
5. U. Häussermann, M. Dolg, H. Stoll, H. Preuss, P. Schwerdtfeger, R. M. Pitzer, *Mol. Phys.* 1993, **78**, 1211–1224.
6. a). K. Fukui, *Acc. Chem. Res.* 1981, **14**, 363–368; b). S. Maeda, Y. Harabuchi, Y. Ono, T. Taketsugu, K. Morokuma, *Int. J. Quantum Chem.* 2015, **115**, 258–269; c) C. Gonzalez, H. B. Schlegel, *J. Phys. Chem.* 1990, **94**, 5523–5527.
7. Y. Zhao, D. G. Truhlar, *Theor. Chem. Acc.* 2008, **120**, 215–241.
8. A. V. Marenich, C. J. Cramer, D. G. Truhlar, *J. Phys. Chem. B* 2009, **113**, 6378–6396.

## NMR Spectra

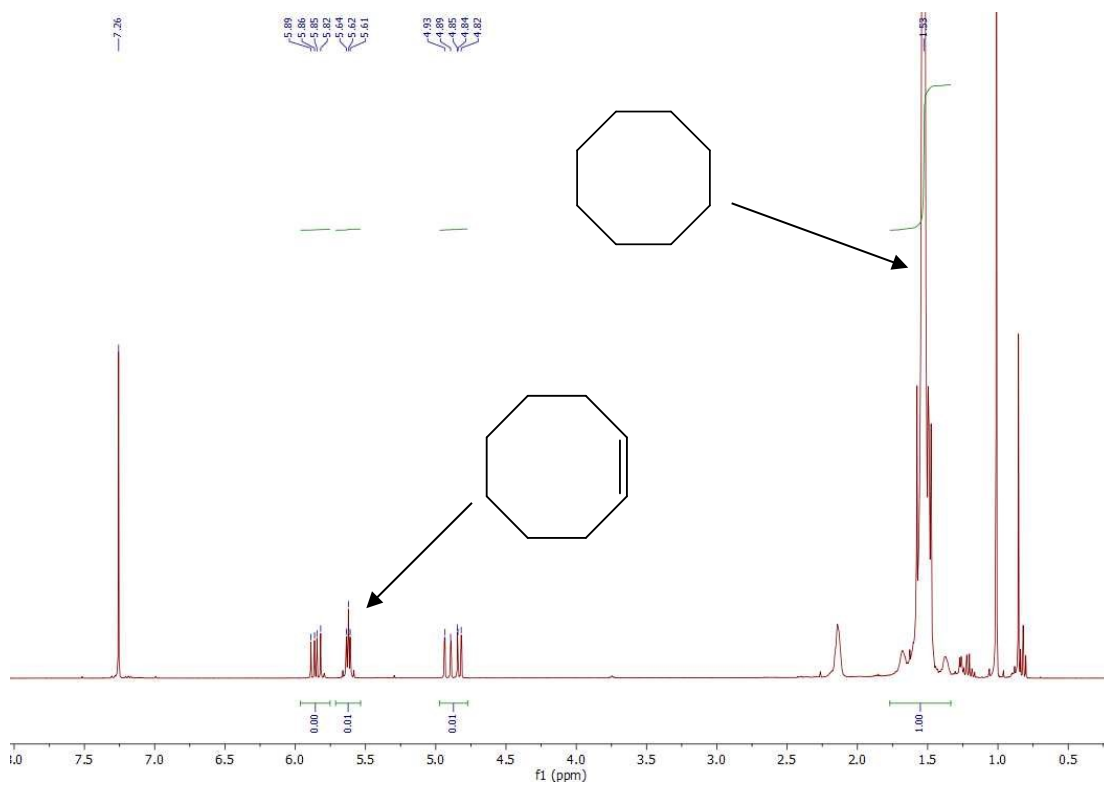

Figure 1: NMR spectra of COA (3.0 mmol), TBE (3.0 mmol), Ir2 (3.0  $\mu$ mol), and NaOtBu (15.0  $\mu$ mol).

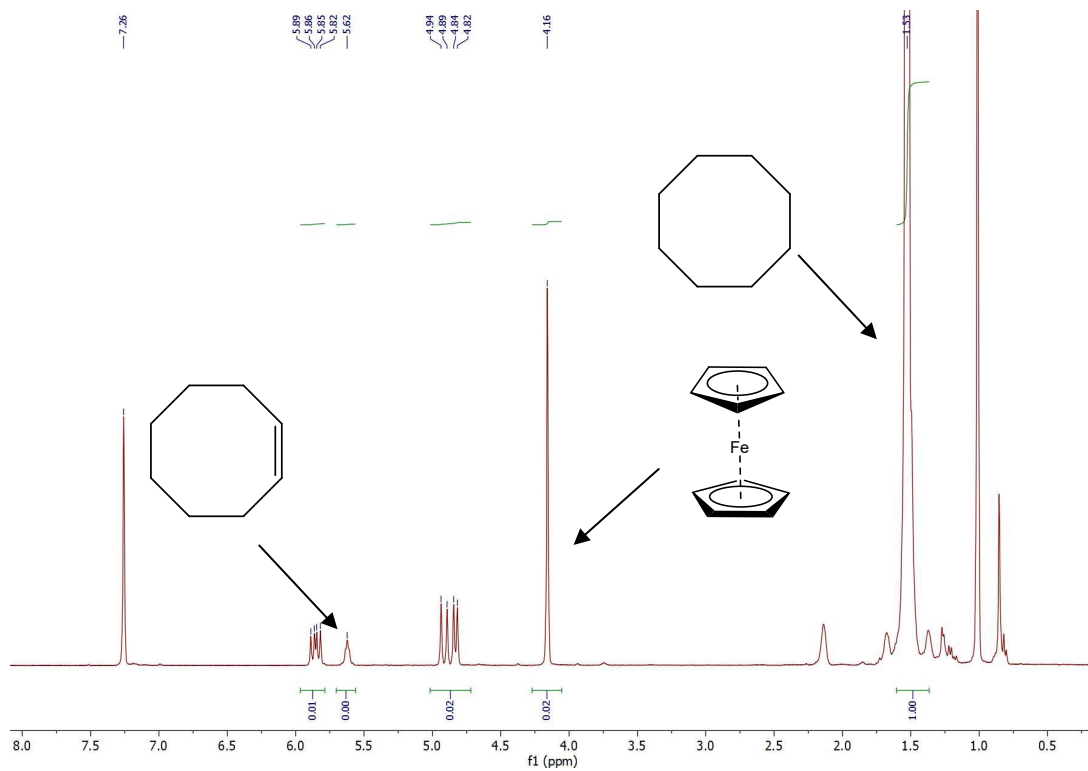

Figure 2: NMR spectra of COA (3.0 mmol), TBE (3.0 mmol), Ir2 (3.0  $\mu$ mol), NaOtBu (15.0  $\mu$ mol), and Fe (15.0  $\mu$ mol).

## GC-MS Spectra

### I. GC-MS spectra of reaction condition optimization for cyclooctane dehydrogenation

| peak # | R.T. min | first scan | max scan | last scan | PK TY | peak height | corr. area | corr. % max. | % of total |
|--------|----------|------------|----------|-----------|-------|-------------|------------|--------------|------------|
| 1      | 1.430    | 186        | 190      | 195       | BB    | 67843       | 724525     | 0.07%        | 0.058%     |
| 2      | 1.616    | 209        | 216      | 225       | BV    | 539082      | 6218071    | 0.57%        | 0.496%     |
| 3      | 1.750    | 225        | 236      | 242       | VV    | 6026830     | 95143559   | 8.69%        | 7.585%     |
| 4      | 1.824    | 242        | 246      | 255       | VV    | 963971      | 14512322   | 1.33%        | 1.157%     |
| 5      | 2.346    | 317        | 320      | 329       | BV 3  | 59737       | 1733696    | 0.16%        | 0.138%     |
| 6      | 2.417    | 329        | 330      | 354       | VV 5  | 31423       | 1394427    | 0.13%        | 0.111%     |
| 7      | 8.472    | 1171       | 1188     | 1212      | BV    | 1152564     | 35824326   | 3.27%        | 2.856%     |
| 8      | 9.447    | 1283       | 1326     | 1350      | BV    | 11326526    | 1094415859 | 100.00%      | 87.243%    |
| 9      | 12.170   | 1705       | 1712     | 1736      | BV    | 56492       | 2057007    | 0.19%        | 0.164%     |
| 10     | 12.387   | 1736       | 1743     | 1755      | PV 4  | 23636       | 684236     | 0.06%        | 0.055%     |
| 11     | 14.959   | 2098       | 2108     | 2138      | BB 5  | 33474       | 1738489    | 0.16%        | 0.139%     |

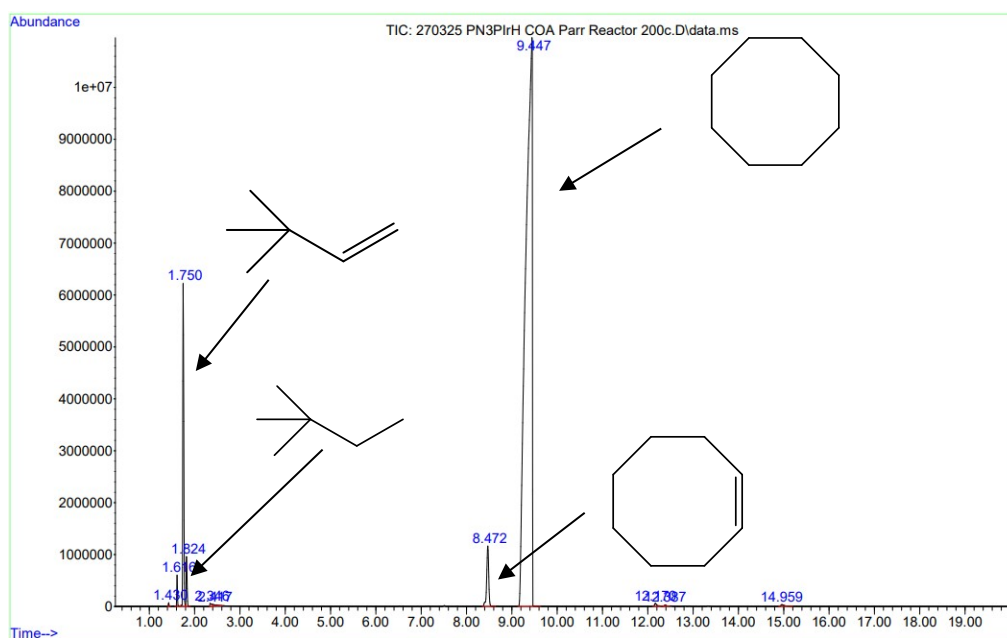

Figure 3: GC-MS spectra of COA (3.0 mmol), TBE (3.0 mmol), Ir2 (3.0  $\mu$ mol), NaO<sup>t</sup>Bu (15.0  $\mu$ mol).

| peak # | R.T. min | first scan | max scan | last scan | PK TY | peak height | corr. area | corr. % max. | % of total |
|--------|----------|------------|----------|-----------|-------|-------------|------------|--------------|------------|
| 1      | 1.430    | 184        | 190      | 196       | BB    | 141497      | 1511597    | 0.16%        | 0.122%     |
| 2      | 1.507    | 197        | 201      | 210       | BB 2  | 155685      | 2394808    | 0.25%        | 0.193%     |
| 3      | 1.615    | 211        | 216      | 224       | BB    | 877998      | 9606598    | 0.99%        | 0.775%     |
| 4      | 1.749    | 224        | 235      | 242       | BB    | 6270256     | 95211298   | 9.78%        | 7.681%     |
| 5      | 1.822    | 242        | 246      | 254       | BB    | 1052024     | 15923575   | 1.64%        | 1.285%     |
| 6      | 8.449    | 1167       | 1185     | 1203      | BB    | 1586277     | 43124646   | 4.43%        | 3.479%     |
| 7      | 9.359    | 1281       | 1314     | 1316      | BB    | 12979010    | 973201372  | 100.00%      | 78.507%    |
| 8      | 20.071   | 2822       | 2832     | 2859      | BB    | 4684067     | 98657763   | 10.14%       | 7.959%     |

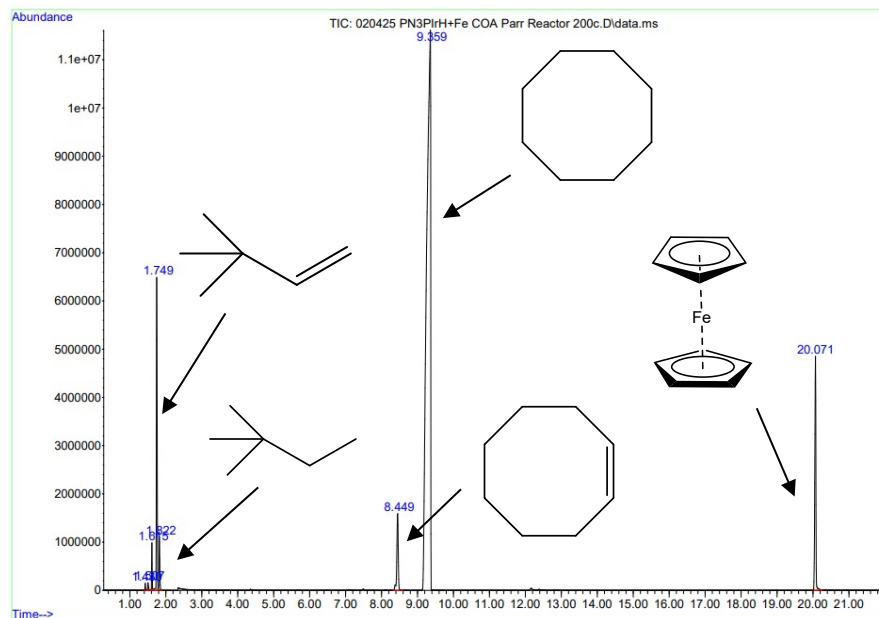

**Figure 4:** GC-MS spectra of COA (3.0 mmol), TBE (3.0 mmol), Ir2 (3.0  $\mu$ mol), NaO<sup>t</sup>Bu (15.0  $\mu$ mol), and Fe (15.0  $\mu$ mol).

## II. GC-MS spectra of the effect of different ratios of tert-butylethylene (TBE) for cyclooctane dehydrogenation

GC-MS spectra were collected to evaluate the effect of varying TBE ratios on cyclooctane dehydrogenation. The resulting changes in product distribution are shown below for 0.3mmol, 1.5mmol and 3mmol of TBE, corresponding to a 1:1000:100, 1:1000:500, and 1:1000:1000 ratio of [Ir2]:COA:TBE respectively.

| peak # | R.T. min | first scan | max scan | last scan | PK TY | peak height | corr. area | corr. % max. | % of total |
|--------|----------|------------|----------|-----------|-------|-------------|------------|--------------|------------|
| 1      | 1.418    | 184        | 188      | 195       | BB    | 259738      | 2700949    | 0.11%        | 0.098%     |
| 2      | 1.646    | 218        | 221      | 227       | BB    | 1140465     | 17232893   | 0.73%        | 0.627%     |
| 3      | 1.714    | 227        | 230      | 238       | BB    | 10772795    | 127622352  | 5.37%        | 4.647%     |
| 4      | 1.795    | 238        | 242      | 250       | BB 2  | 723313      | 10561596   | 0.44%        | 0.385%     |
| 5      | 8.359    | 1155       | 1172     | 1194      | BB 7  | 286296      | 17820227   | 0.75%        | 0.649%     |
| 6      | 9.383    | 1268       | 1317     | 1341      | BB    | 19684188    | 2374626420 | 100.00%      | 86.459%    |
| 7      | 10.696   | 1491       | 1504     | 1546      | BB    | 6650526     | 195966333  | 8.25%        | 7.135%     |

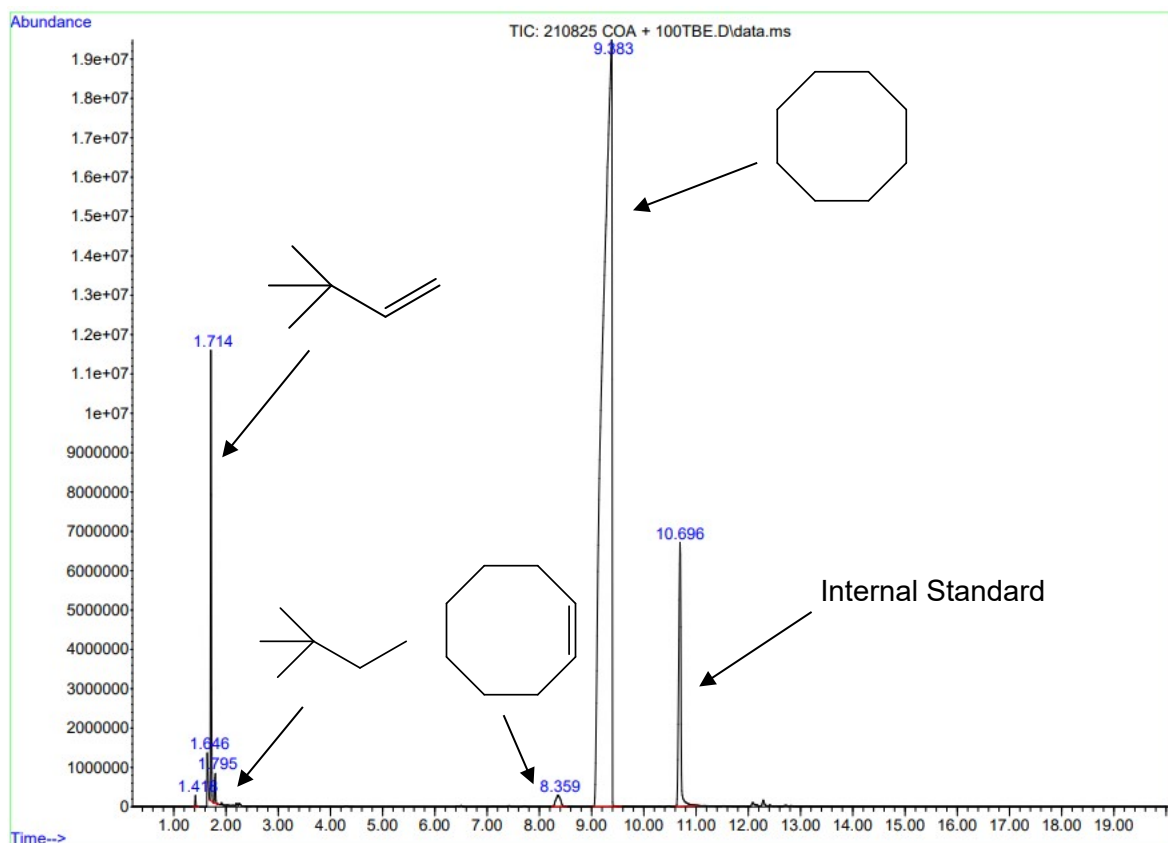

Figure 5: GC-MS spectra of COA (3.0 mmol), TBE (0.3mmol), Ir2 (3.0  $\mu$ mol), and NaO<sup>t</sup>Bu (15.0  $\mu$ mol).

| peak # | R.T. min | first scan | max scan | last scan | PK TY | peak height | corr. area | corr. % max. | % of total |
|--------|----------|------------|----------|-----------|-------|-------------|------------|--------------|------------|
| 1      | 1.417    | 182        | 188      | 195       | BB    | 219316      | 2341654    | 0.14%        | 0.108%     |
| 2      | 1.646    | 218        | 221      | 227       | BB    | 1240011     | 18036549   | 1.07%        | 0.830%     |
| 3      | 1.713    | 227        | 230      | 238       | BB    | 19385606    | 256818244  | 15.23%       | 11.825%    |
| 4      | 1.792    | 238        | 241      | 249       | BB 2  | 515919      | 7823214    | 0.46%        | 0.360%     |
| 5      | 1.917    | 256        | 259      | 269       | BB    | 166369      | 1887853    | 0.11%        | 0.087%     |
| 6      | 8.361    | 1157       | 1172     | 1192      | BB 6  | 159930      | 10172573   | 0.60%        | 0.468%     |
| 7      | 9.330    | 1264       | 1310     | 1316      | BB    | 16701150    | 1686727523 | 100.00%      | 77.664%    |
| 8      | 10.690   | 1490       | 1503     | 1558      | BB    | 6186046     | 188026891  | 11.15%       | 8.658%     |

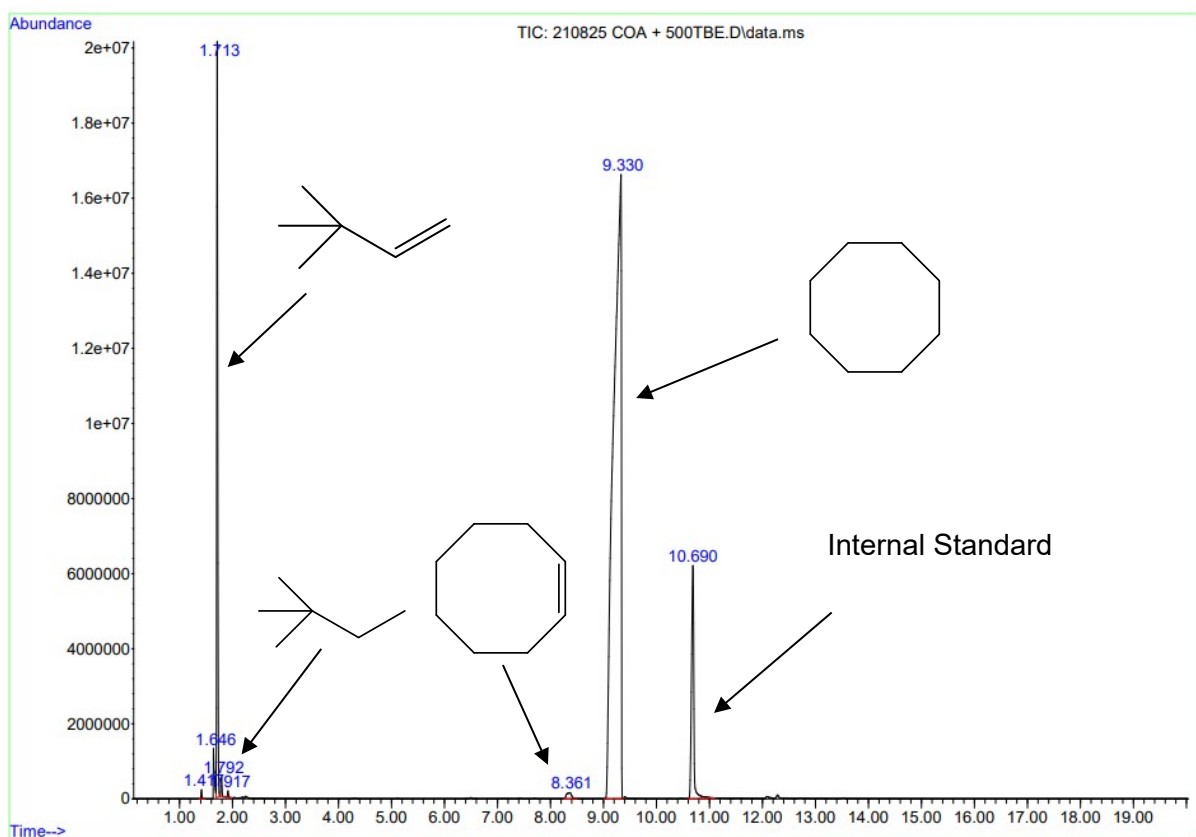

Figure 6: GC-MS spectra of COA (3.0 mmol), TBE (1.5 mmol), Ir2 (3.0  $\mu$ mol), and NaO<sup>t</sup>Bu (15.0  $\mu$ mol).

| peak # | R.T. min | first scan | max scan | last scan | PK TY | peak height | corr. area | corr. % max. | % of total |
|--------|----------|------------|----------|-----------|-------|-------------|------------|--------------|------------|
| 1      | 1.418    | 183        | 188      | 195       | BB    | 225815      | 2356796    | 0.18%        | 0.130%     |
| 2      | 1.645    | 218        | 221      | 227       | BB    | 1245597     | 18014753   | 1.40%        | 0.994%     |
| 3      | 1.712    | 227        | 230      | 238       | BB    | 21135752    | 300896430  | 23.33%       | 16.610%    |
| 4      | 1.796    | 238        | 242      | 249       | BB 2  | 420861      | 5888442    | 0.46%        | 0.325%     |
| 5      | 1.916    | 256        | 259      | 271       | BBA   | 239707      | 2531675    | 0.20%        | 0.140%     |
| 6      | 8.364    | 1156       | 1173     | 1185      | BB 5  | 123822      | 5292639    | 0.41%        | 0.292%     |
| 7      | 9.294    | 1265       | 1305     | 1311      | BB    | 15097791    | 1289928539 | 100.00%      | 71.207%    |
| 8      | 10.690   | 1489       | 1503     | 1564      | BB    | 6031873     | 186616372  | 14.47%       | 10.302%    |

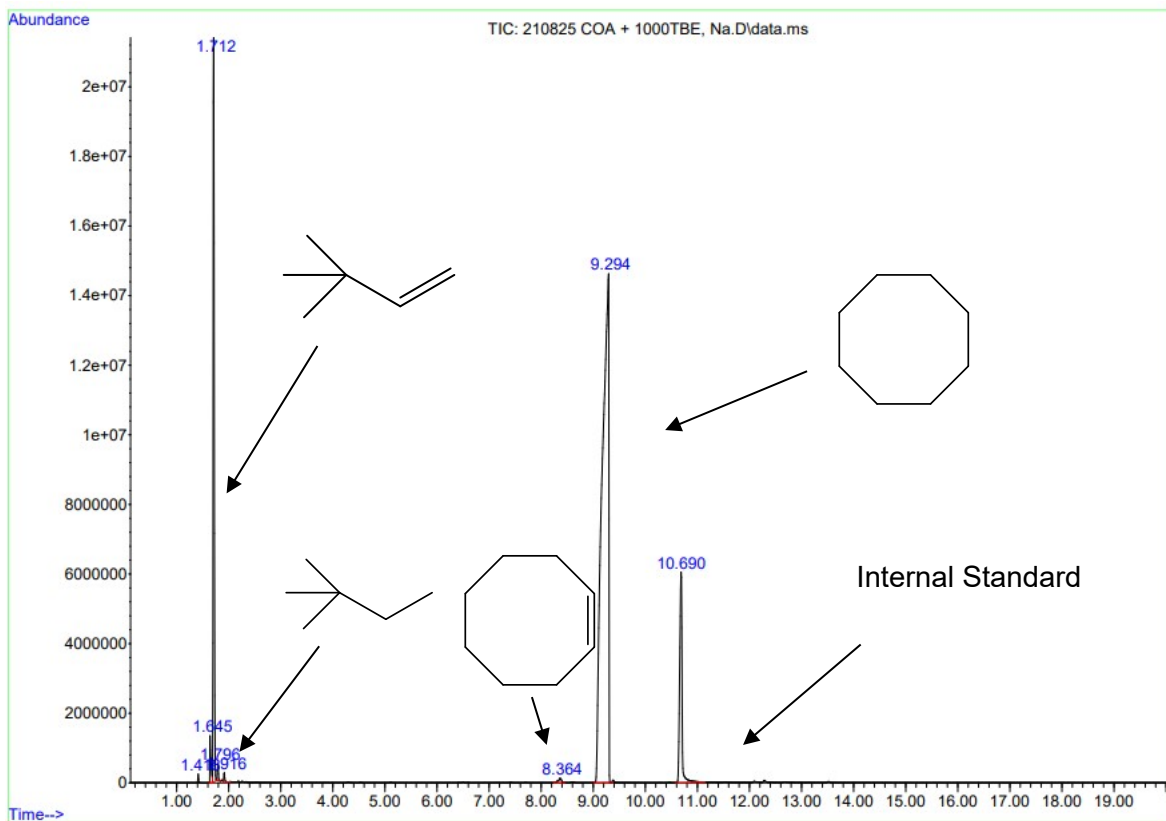

Figure 7: GC-MS spectra of COA (3.0 mmol), TBE (3.0 mmol), Ir2 (3.0  $\mu$ mol), and NaO<sup>t</sup>Bu (15.0  $\mu$ mol).

### III. Time dependent study for cyclooctane dehydrogenation

GC-MS spectra were collected for cyclooctane dehydrogenation reactions run for 4 h, 16 h, and 24 h. The data shows an increase in the product formation over time up to 24h. GC-MS spectra were collected for the dehydrogenation of cyclooctane using KO<sup>t</sup>Bu and NaO<sup>t</sup>Bu. Only the KO<sup>t</sup>Bu data are shown here, as both bases exhibited similar trends in product formation over time.

| peak # | R.T. min | first scan | max scan | last scan | PK TY | peak height | corr. area | corr. % max. | % of total |
|--------|----------|------------|----------|-----------|-------|-------------|------------|--------------|------------|
| 1      | 1.418    | 184        | 188      | 195       | BB    | 383339      | 3953817    | 0.26%        | 0.186%     |
| 2      | 1.646    | 218        | 221      | 226       | BB    | 809127      | 10591548   | 0.70%        | 0.498%     |
| 3      | 1.711    | 226        | 230      | 238       | BB    | 21891215    | 323718962  | 21.35%       | 15.216%    |
| 4      | 1.800    | 238        | 243      | 249       | BB 2  | 295588      | 3766414    | 0.25%        | 0.177%     |
| 5      | 1.914    | 256        | 259      | 271       | BBA   | 274209      | 2670903    | 0.18%        | 0.126%     |
| 6      | 8.361    | 1158       | 1173     | 1188      | BB 2  | 67224       | 2451716    | 0.16%        | 0.115%     |
| 7      | 9.260    | 1264       | 1300     | 1308      | BB    | 17201639    | 1516538993 | 100.00%      | 71.285%    |
| 8      | 9.362    | 1309       | 1314     | 1329      | BB    | 165997      | 3532174    | 0.23%        | 0.166%     |
| 9      | 10.683   | 1488       | 1502     | 1536      | BB    | 8500236     | 260200288  | 17.16%       | 12.231%    |

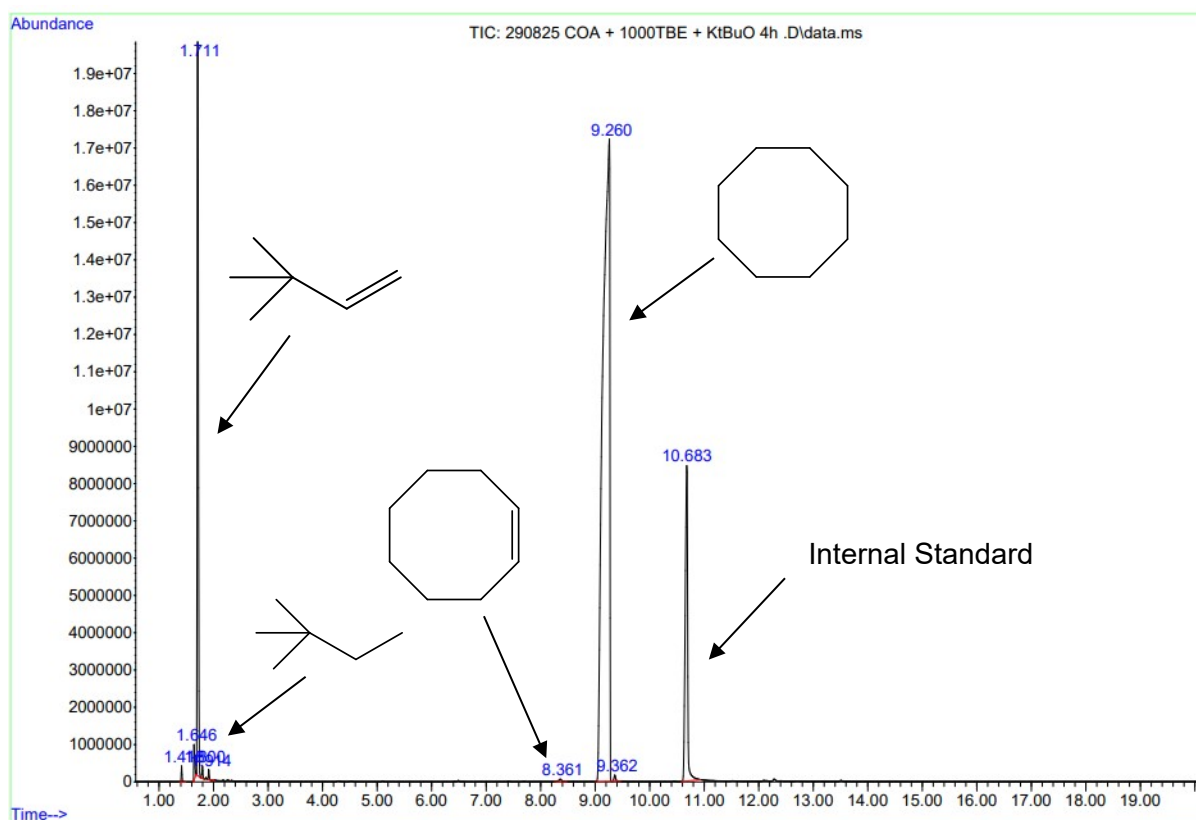

Figure 8: GC-MS spectra of COA (3.0 mmol), TBE (3.0 mmol), Ir2 (3.0 μmol), and KO<sup>t</sup>Bu (15.0 μmol) after 4h.

| peak # | R.T. min | first scan | max scan | last scan | PK TY | peak height | corr. area | corr. % max. | % of total |
|--------|----------|------------|----------|-----------|-------|-------------|------------|--------------|------------|
| 1      | 1.417    | 183        | 188      | 195       | BB    | 406502      | 4232258    | 0.23%        | 0.171%     |
| 2      | 1.646    | 218        | 221      | 226       | BB    | 793203      | 10158765   | 0.56%        | 0.409%     |
| 3      | 1.711    | 226        | 230      | 238       | BB    | 22932270    | 360431452  | 20.01%       | 14.521%    |
| 4      | 1.797    | 238        | 242      | 249       | BB 2  | 838493      | 11016482   | 0.61%        | 0.444%     |
| 5      | 1.914    | 256        | 259      | 267       | BB    | 378220      | 4026217    | 0.22%        | 0.162%     |
| 6      | 8.359    | 1155       | 1172     | 1188      | BB 4  | 156164      | 7380239    | 0.41%        | 0.297%     |
| 7      | 9.286    | 1266       | 1304     | 1306      | BB    | 18524776    | 1801474848 | 100.00%      | 72.576%    |
| 8      | 9.377    | 1306       | 1317     | 1327      | BB 2  | 245646      | 17878229   | 0.99%        | 0.720%     |
| 9      | 10.683   | 1488       | 1502     | 1555      | BB    | 8598424     | 265582021  | 14.74%       | 10.700%    |

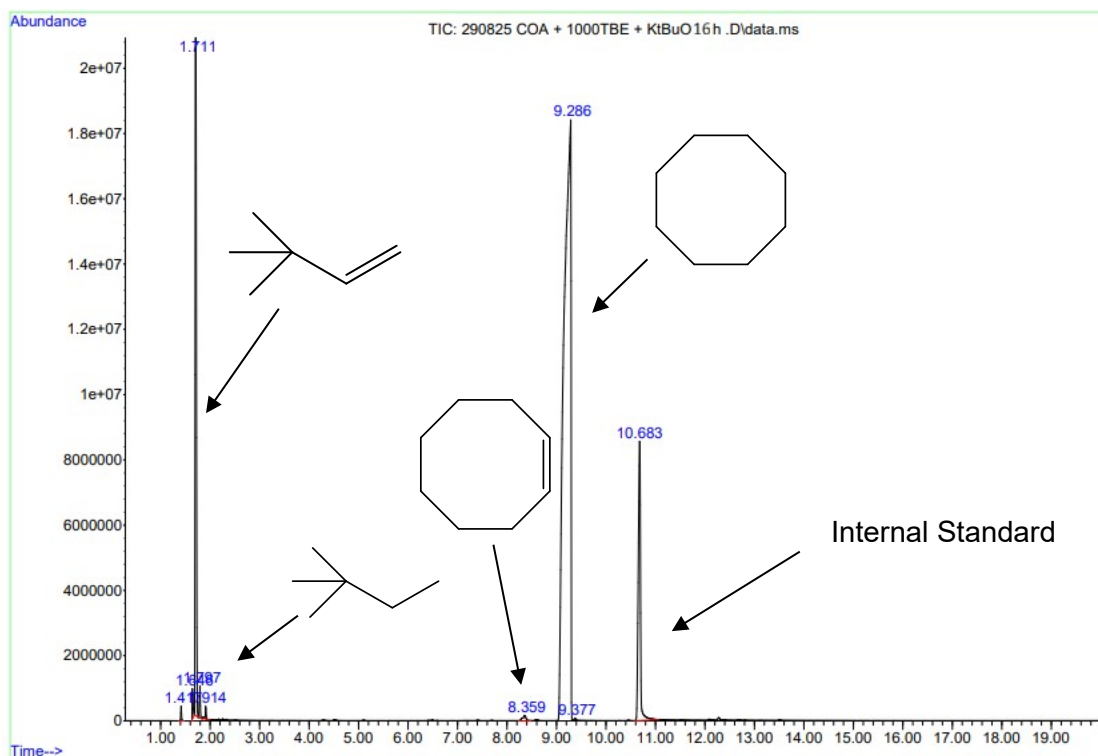

**Figure 9:** GC-MS spectra of COA (3.0 mmol), TBE (3.0 mmol), Ir2 (3.0  $\mu$ mol), and KO<sup>t</sup>Bu (15.0  $\mu$ mol) after 16h.

| peak # | R.T. min | first scan | max scan | last scan | PK TY | peak height | corr. area | corr. % max. | % of total |
|--------|----------|------------|----------|-----------|-------|-------------|------------|--------------|------------|
| 1      | 1.418    | 184        | 188      | 195       | BB    | 247969      | 2568682    | 0.14%        | 0.111%     |
| 2      | 1.645    | 218        | 221      | 227       | BB    | 1433195     | 20313636   | 1.12%        | 0.880%     |
| 3      | 1.714    | 227        | 230      | 238       | BB    | 19914265    | 272722041  | 15.06%       | 11.820%    |
| 4      | 1.792    | 238        | 241      | 249       | BB 2  | 620512      | 8707405    | 0.48%        | 0.377%     |
| 5      | 1.917    | 256        | 259      | 270       | BB    | 187571      | 2097935    | 0.12%        | 0.091%     |
| 6      | 8.359    | 1158       | 1172     | 1193      | BB 5  | 172844      | 11059769   | 0.61%        | 0.479%     |
| 7      | 9.344    | 1265       | 1312     | 1317      | BB    | 16924503    | 1810582151 | 100.00%      | 78.472%    |
| 8      | 10.689   | 1488       | 1503     | 1555      | BB    | 5990565     | 179237787  | 9.90%        | 7.768%     |

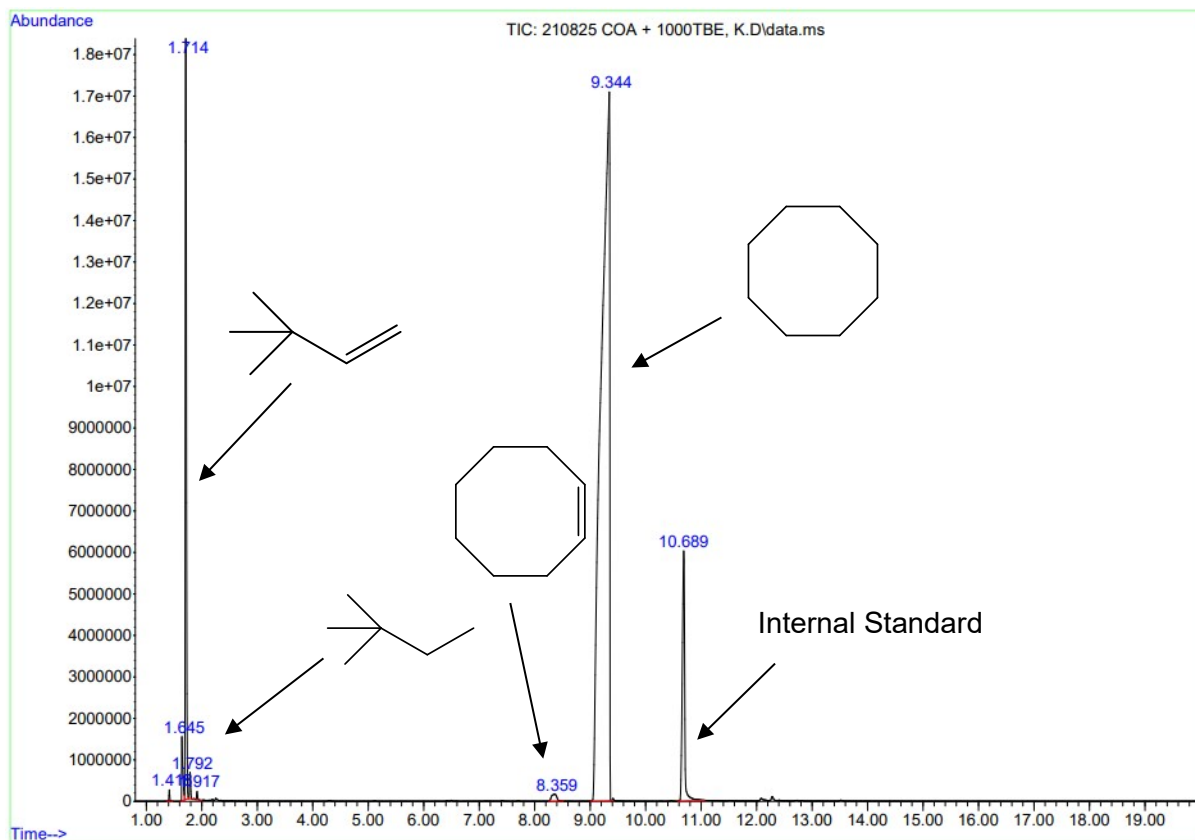

Figure 10: GC-MS spectra of COA (3.0 mmol), TBE (3.0 mmol), Ir2 (3.0  $\mu$ mol), and KO<sup>t</sup>Bu (15.0  $\mu$ mol) after 24h.

#### IV. Substrate scope study

GC-MS analysis was conducted to confirm product formation in the substrate scope study. Retention times and mass spectra matched expected values, with molecular ion peaks and key fragments consistent with the proposed products. Representative spectra are included.

| peak # | R.T. min | first scan | max scan | last scan | PK TY | peak height | corr. area | corr. % max. | % of total |
|--------|----------|------------|----------|-----------|-------|-------------|------------|--------------|------------|
| 1      | 1.645    | 218        | 221      | 226       | BB    | 925875      | 10385977   | 0.31%        | 0.262%     |
| 2      | 1.711    | 226        | 230      | 238       | BB    | 22884533    | 377124868  | 11.11%       | 9.510%     |
| 3      | 1.791    | 238        | 241      | 248       | BB    | 1414683     | 15245427   | 0.45%        | 0.384%     |
| 4      | 10.661   | 1486       | 1498     | 1513      | BB    | 5571061     | 144208069  | 4.25%        | 3.637%     |
| 5      | 16.738   | 2311       | 2360     | 2378      | BB    | 26322548    | 3395787736 | 100.00%      | 85.636%    |
| 6      | 16.992   | 2388       | 2396     | 2408      | BB    | 1058752     | 22611368   | 0.67%        | 0.570%     |

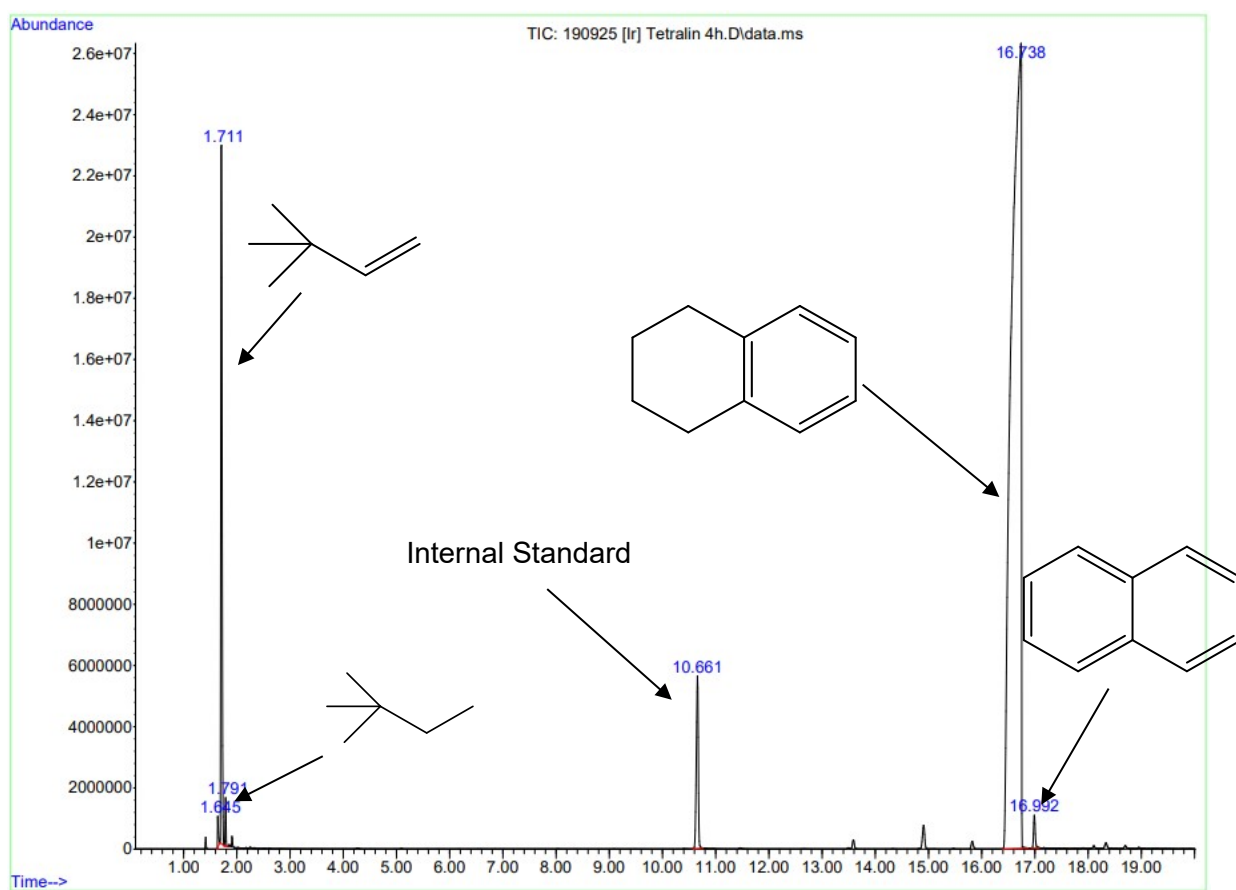

**Figure 11:** GC-MS spectra of tetralin (3.0 mmol), TBE (3.0 mmol), Ir2 (3.0  $\mu$ mol), and NaOtBu (15.0  $\mu$ mol).
